# Supplementary material
Source: publisher figshare collection journal article supplement (https://tandf.figshare.com/ndownloader/files/15583703)
Supplement: Supplementary file 1 [file 15583703]

Supporting Information

**Cucurbit[8]uril-improved recognition using a fluorescent sensor for different metal cations**

*Xin Yu Deng, Wei Tao Xu, Ming Liu, Mei Xiang Yang, Qian Jiang Zhu ,Li Bin Lü* and Zhu Tao**


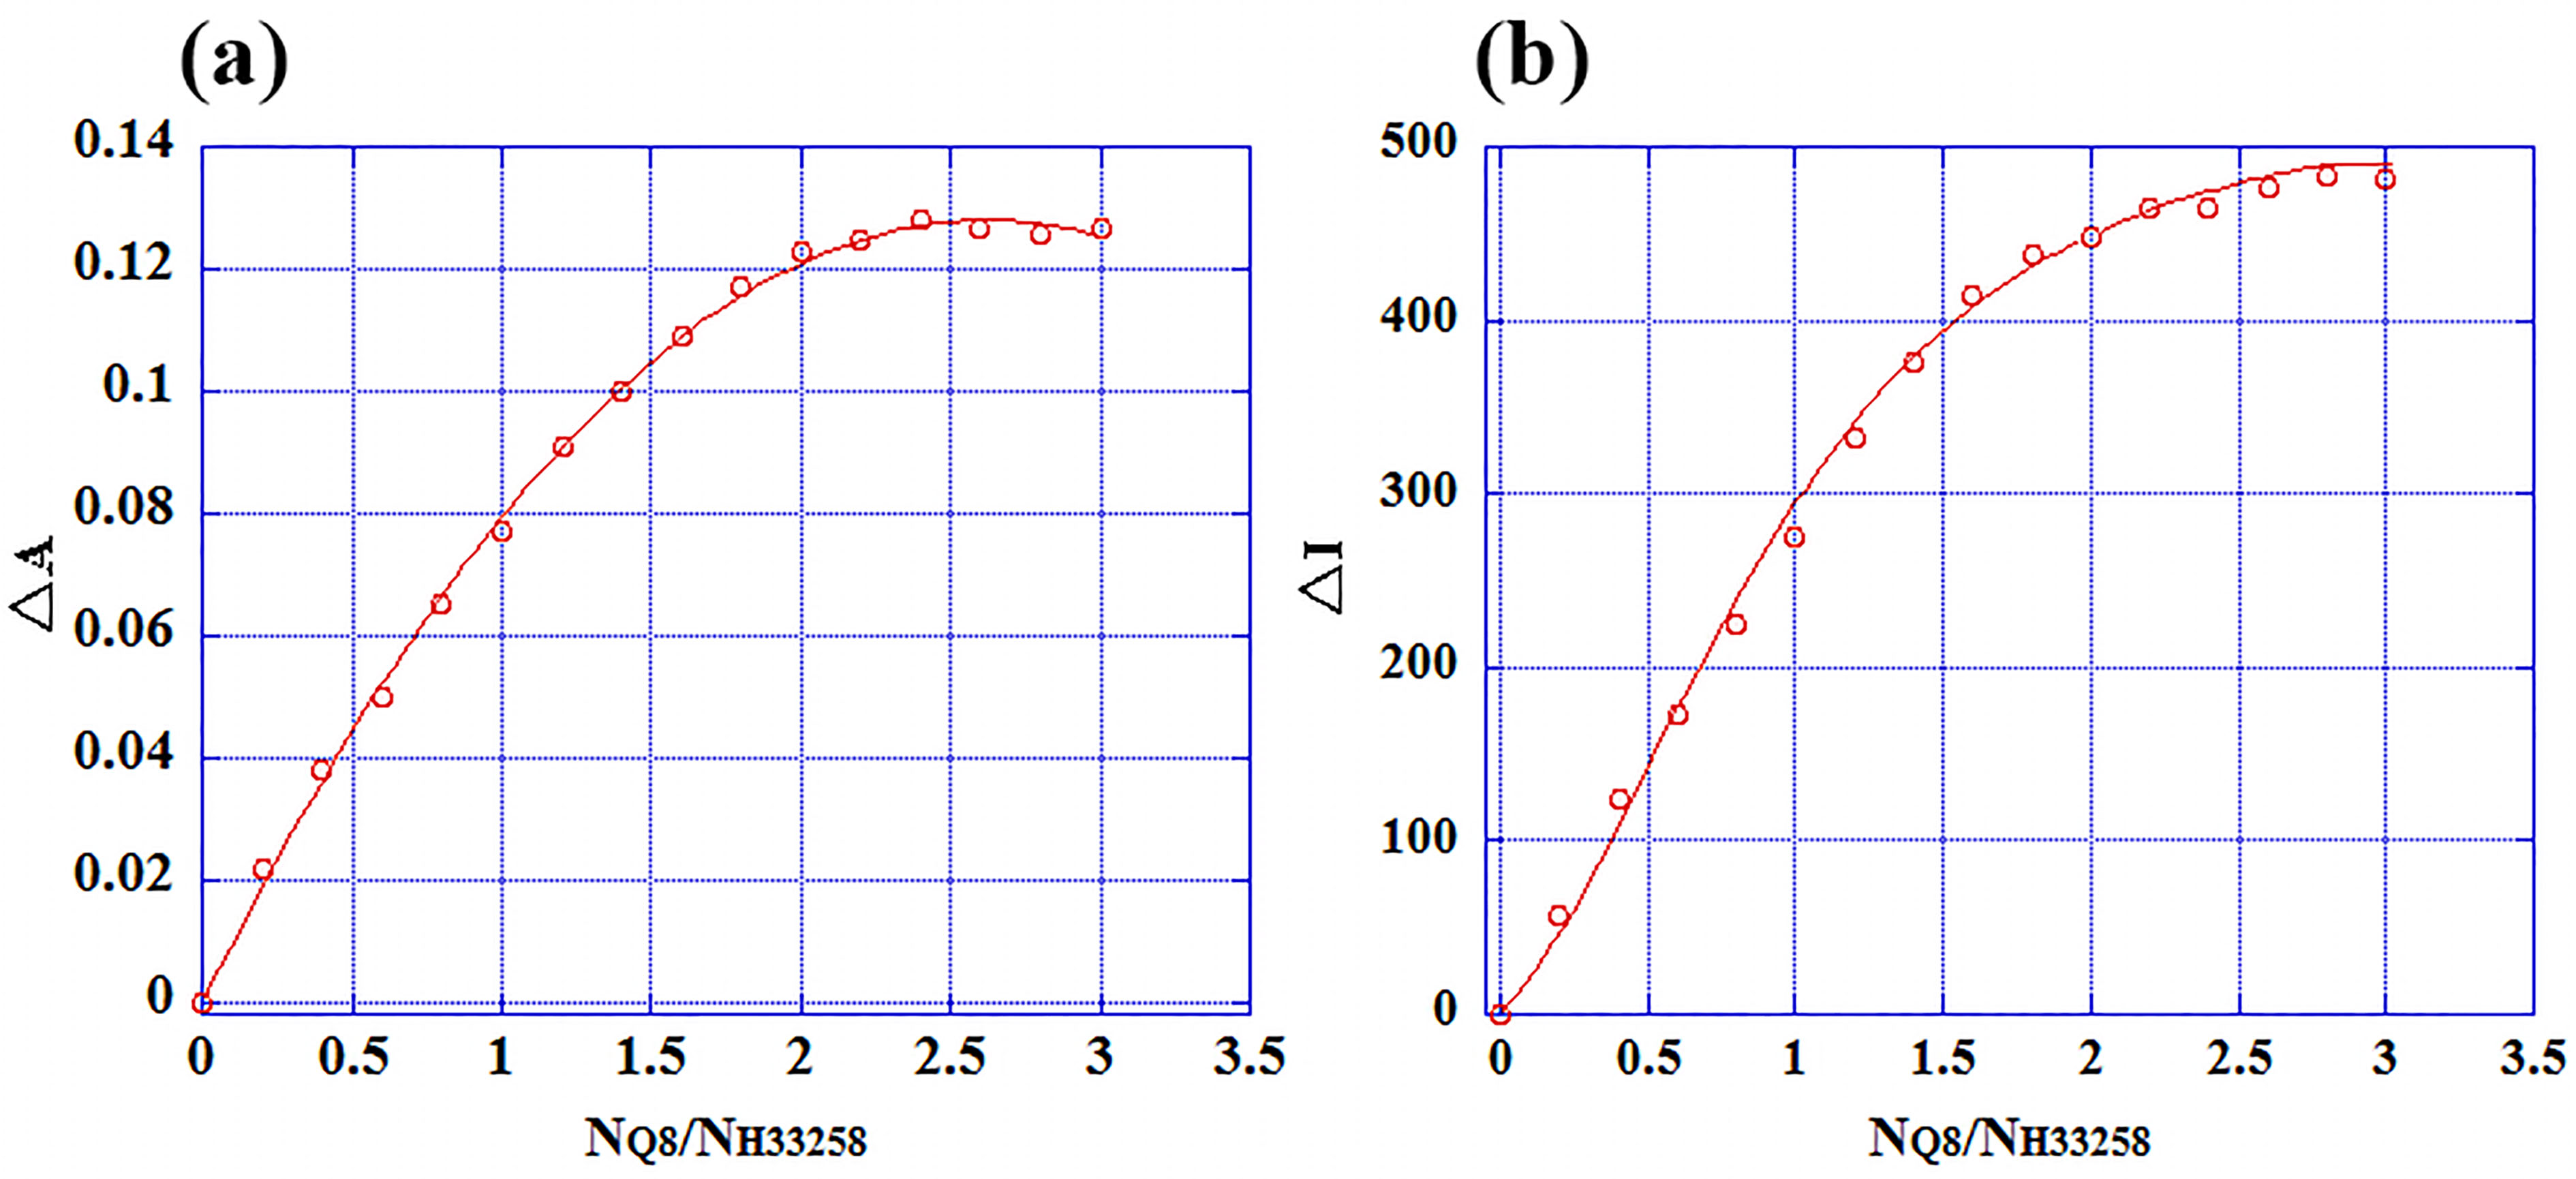


**Figure S1.** nonlinear fitting curves for changes in the (a) absorbance and (b) fluorescence intensity of H33258 (10 μM) in the presence of different concentrations of Q[8].


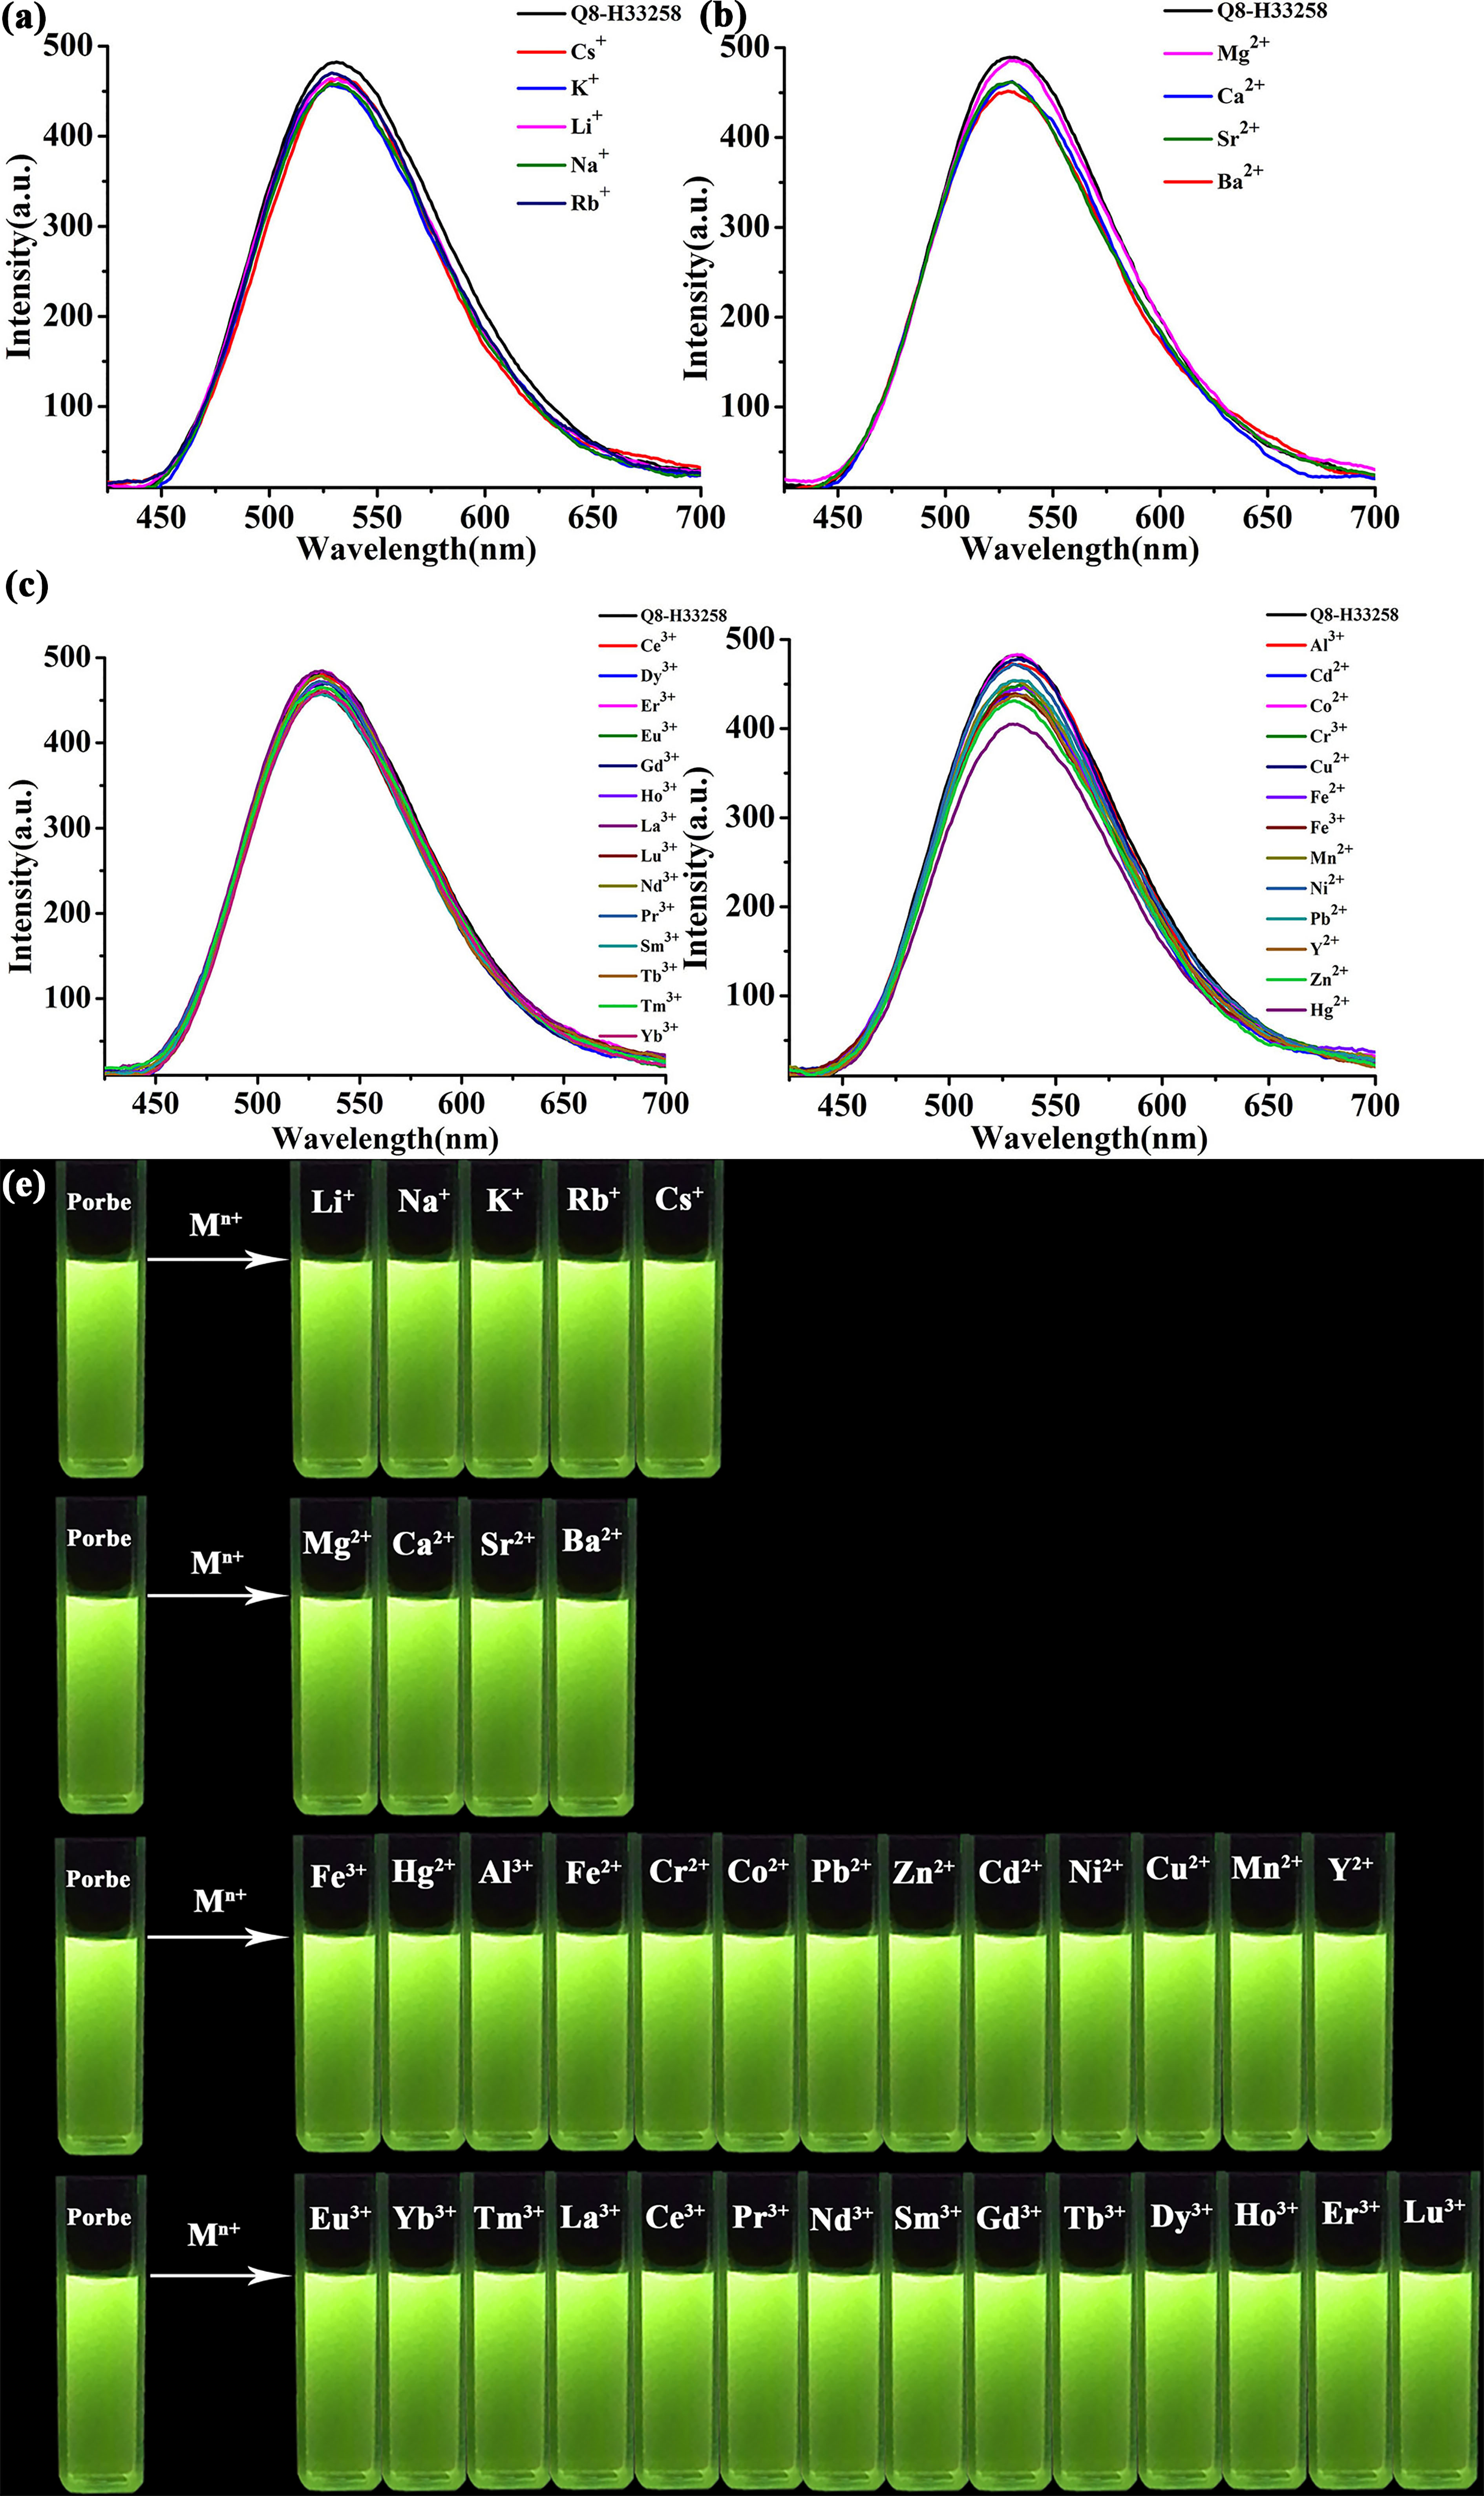


**Figure S2.** (a-d) The effect of the Mn+cations (50 equiv.) on the relative fluorescence response (λmaxem=480 nm) of the H33258@Q[8](1:2, 10 μM) at pH 1.5. (e) Photographs of the H33258@Q[8] systems containing 50 equiv. of the various metal ions under UV light irradiation at 365 nm.


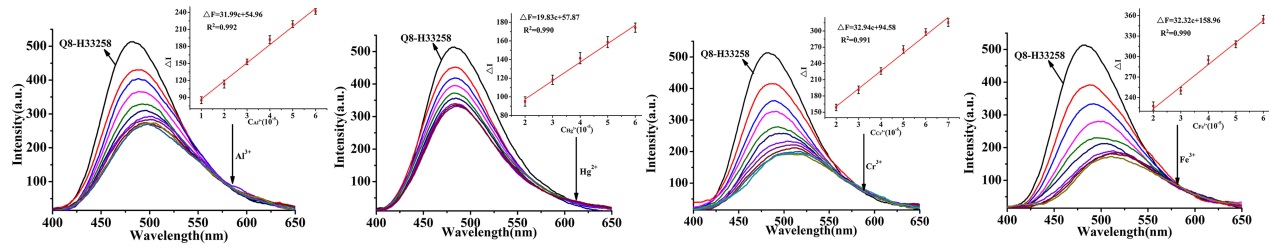

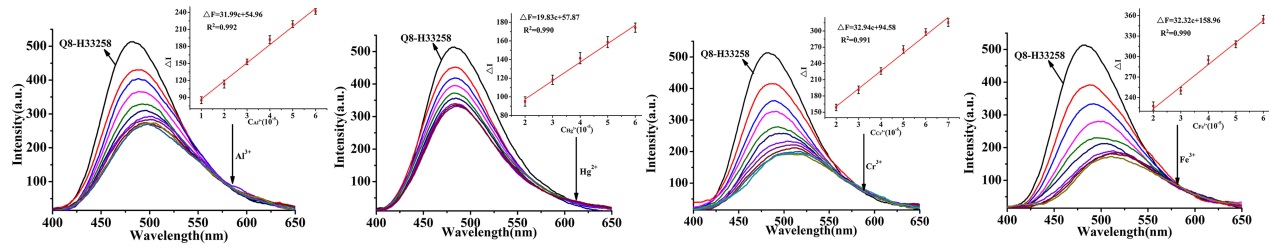

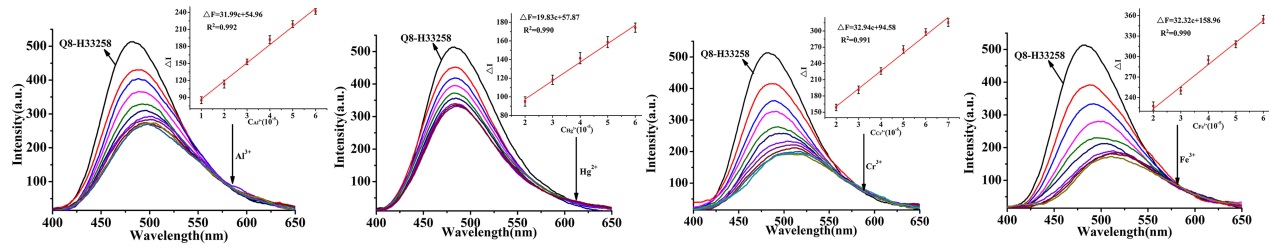

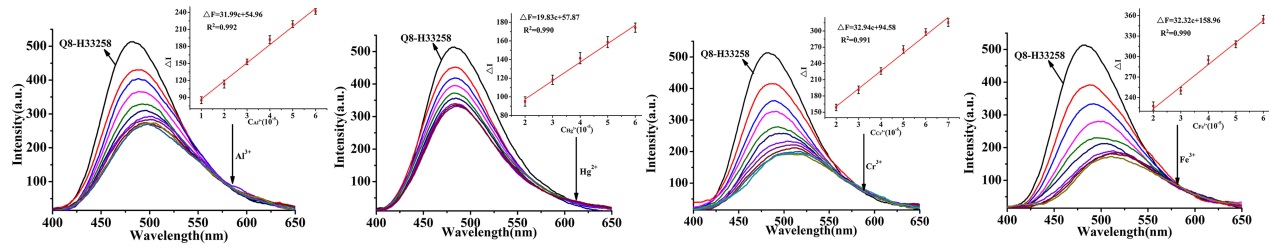

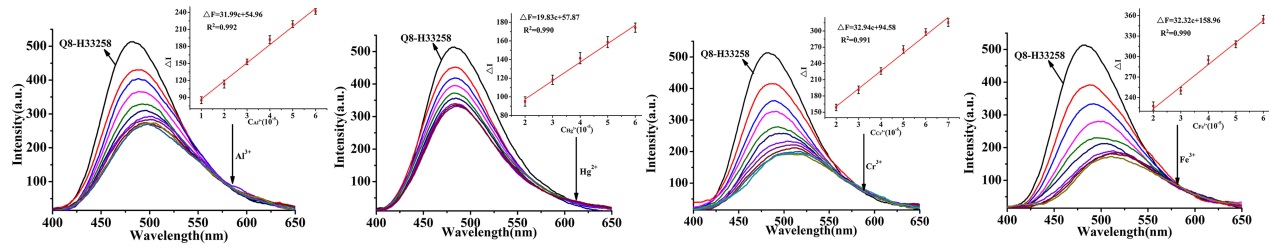

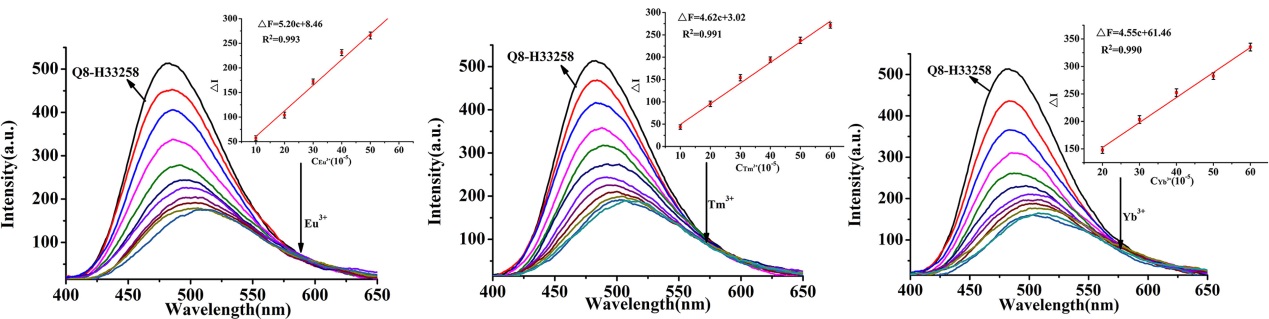


**Figure S3.** Titration fluorescent spectra of the H33258@Q[8] inclusion complex (1:2; 10 μM at pH = 7.2) with the mentioned metal cations, respectively; Inset: nonlinear fitting curves for changes in the fluorescence intensity of the inclusion complex in the presence of different concentrations of the mentioned metal cations (λem = 342 nm).


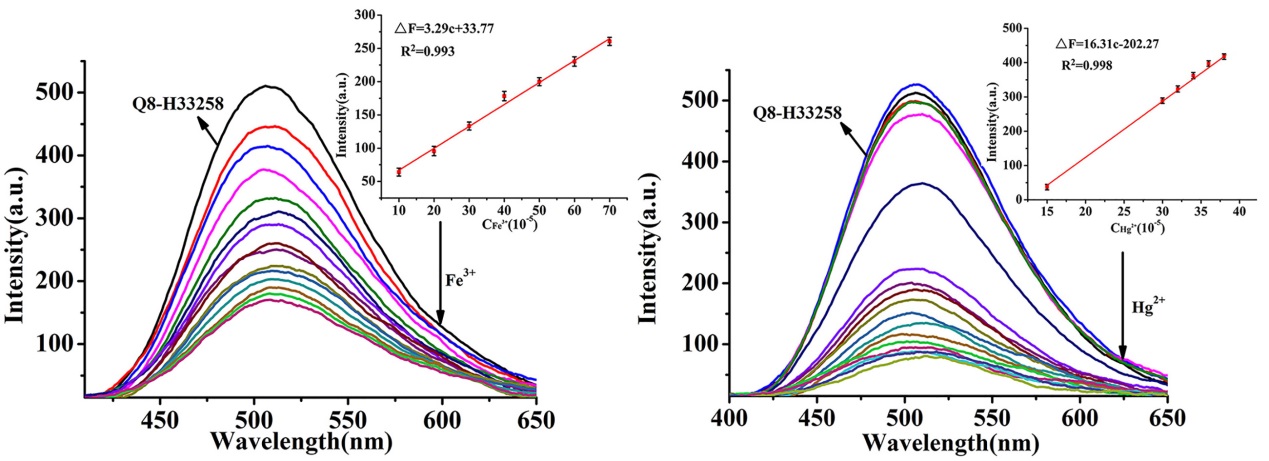


**Figure S4.** Titration fluorescent spectra of the H33258@Q[8] inclusion complex (2:1; 10 μM at pH = 4.5) with the mentioned metal cations, respectively; Inset: nonlinear fitting curves for changes in the fluorescence intensity of the inclusion complex in the presence of different concentrations of the mentioned metal cations (λem = 346 nm).


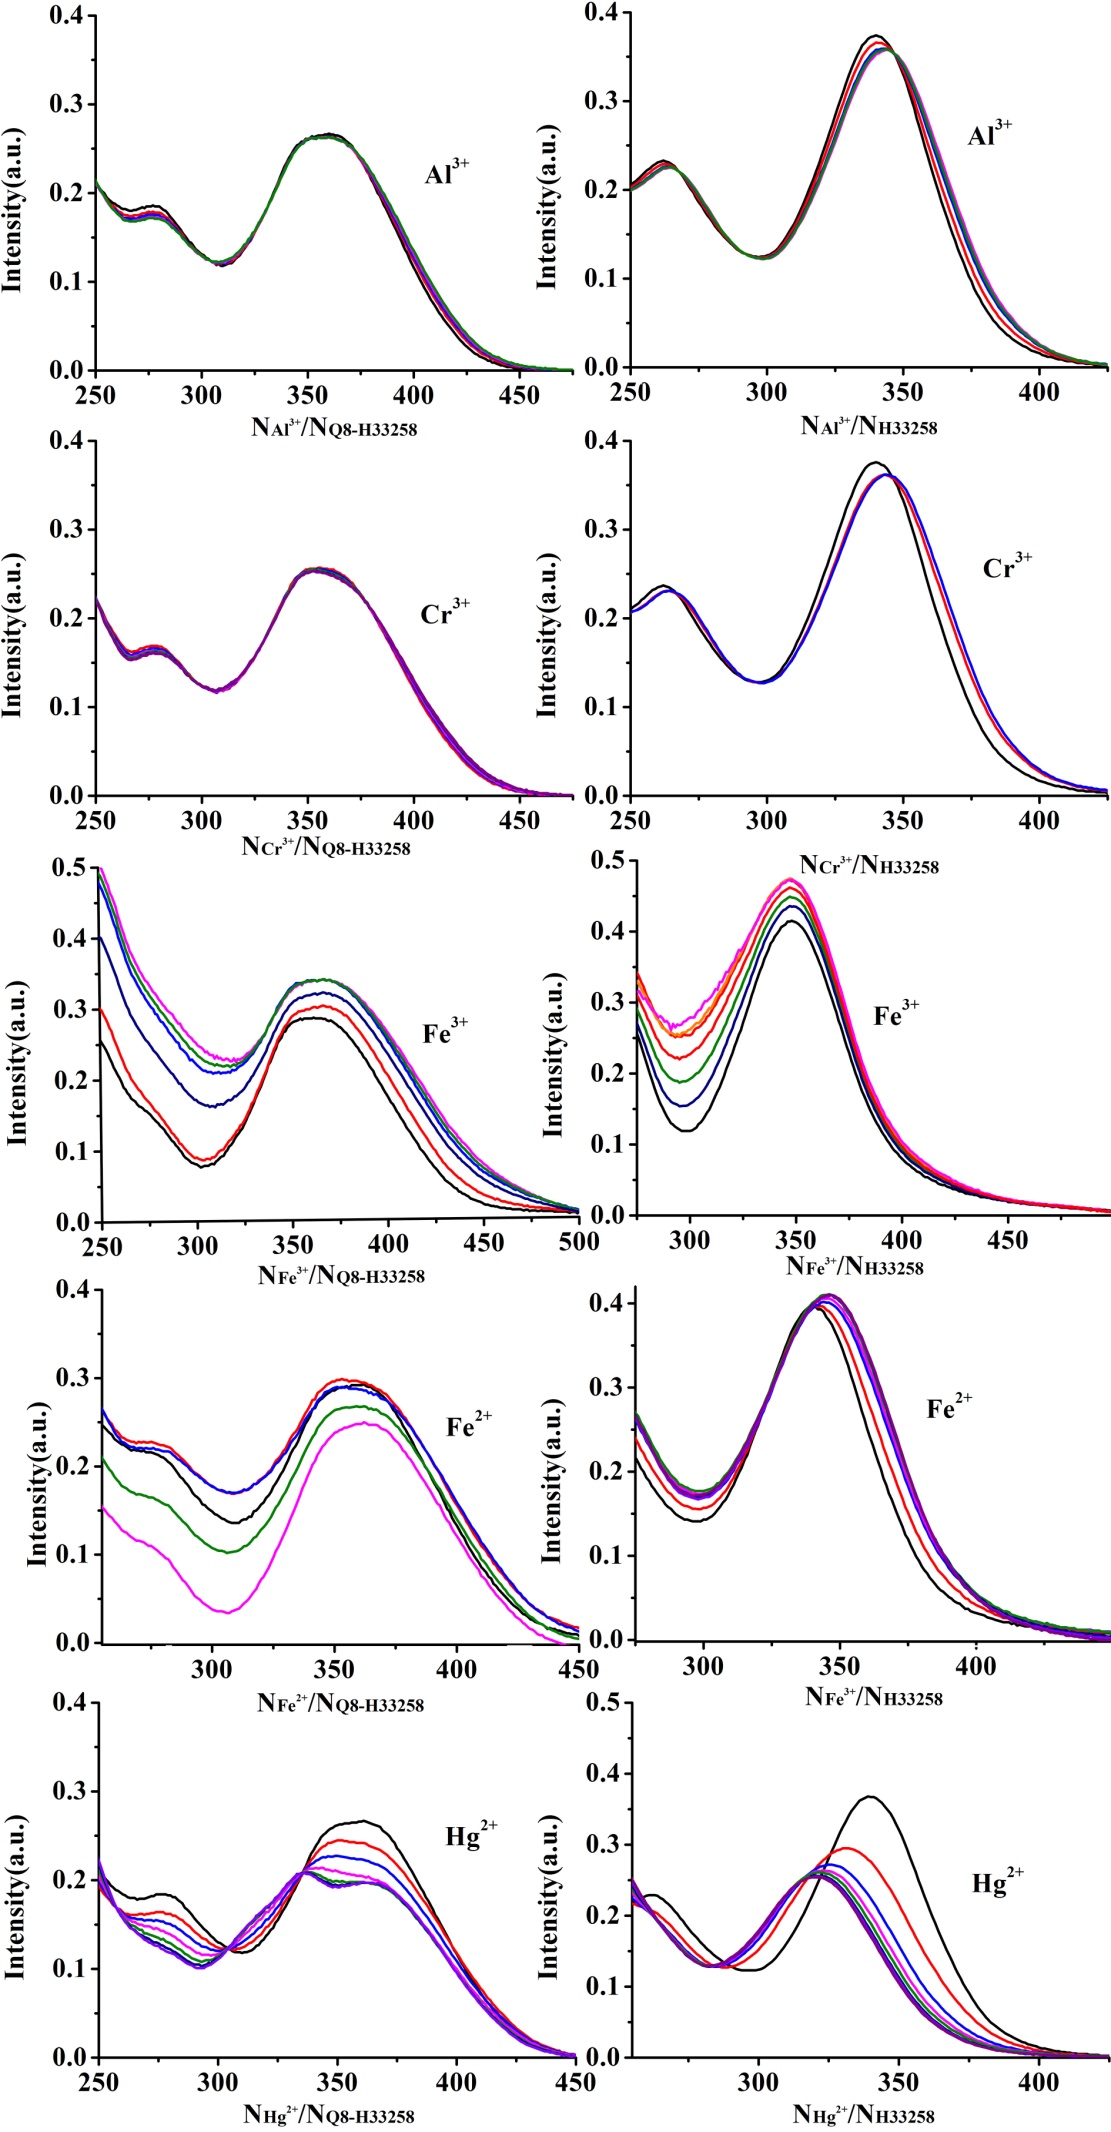


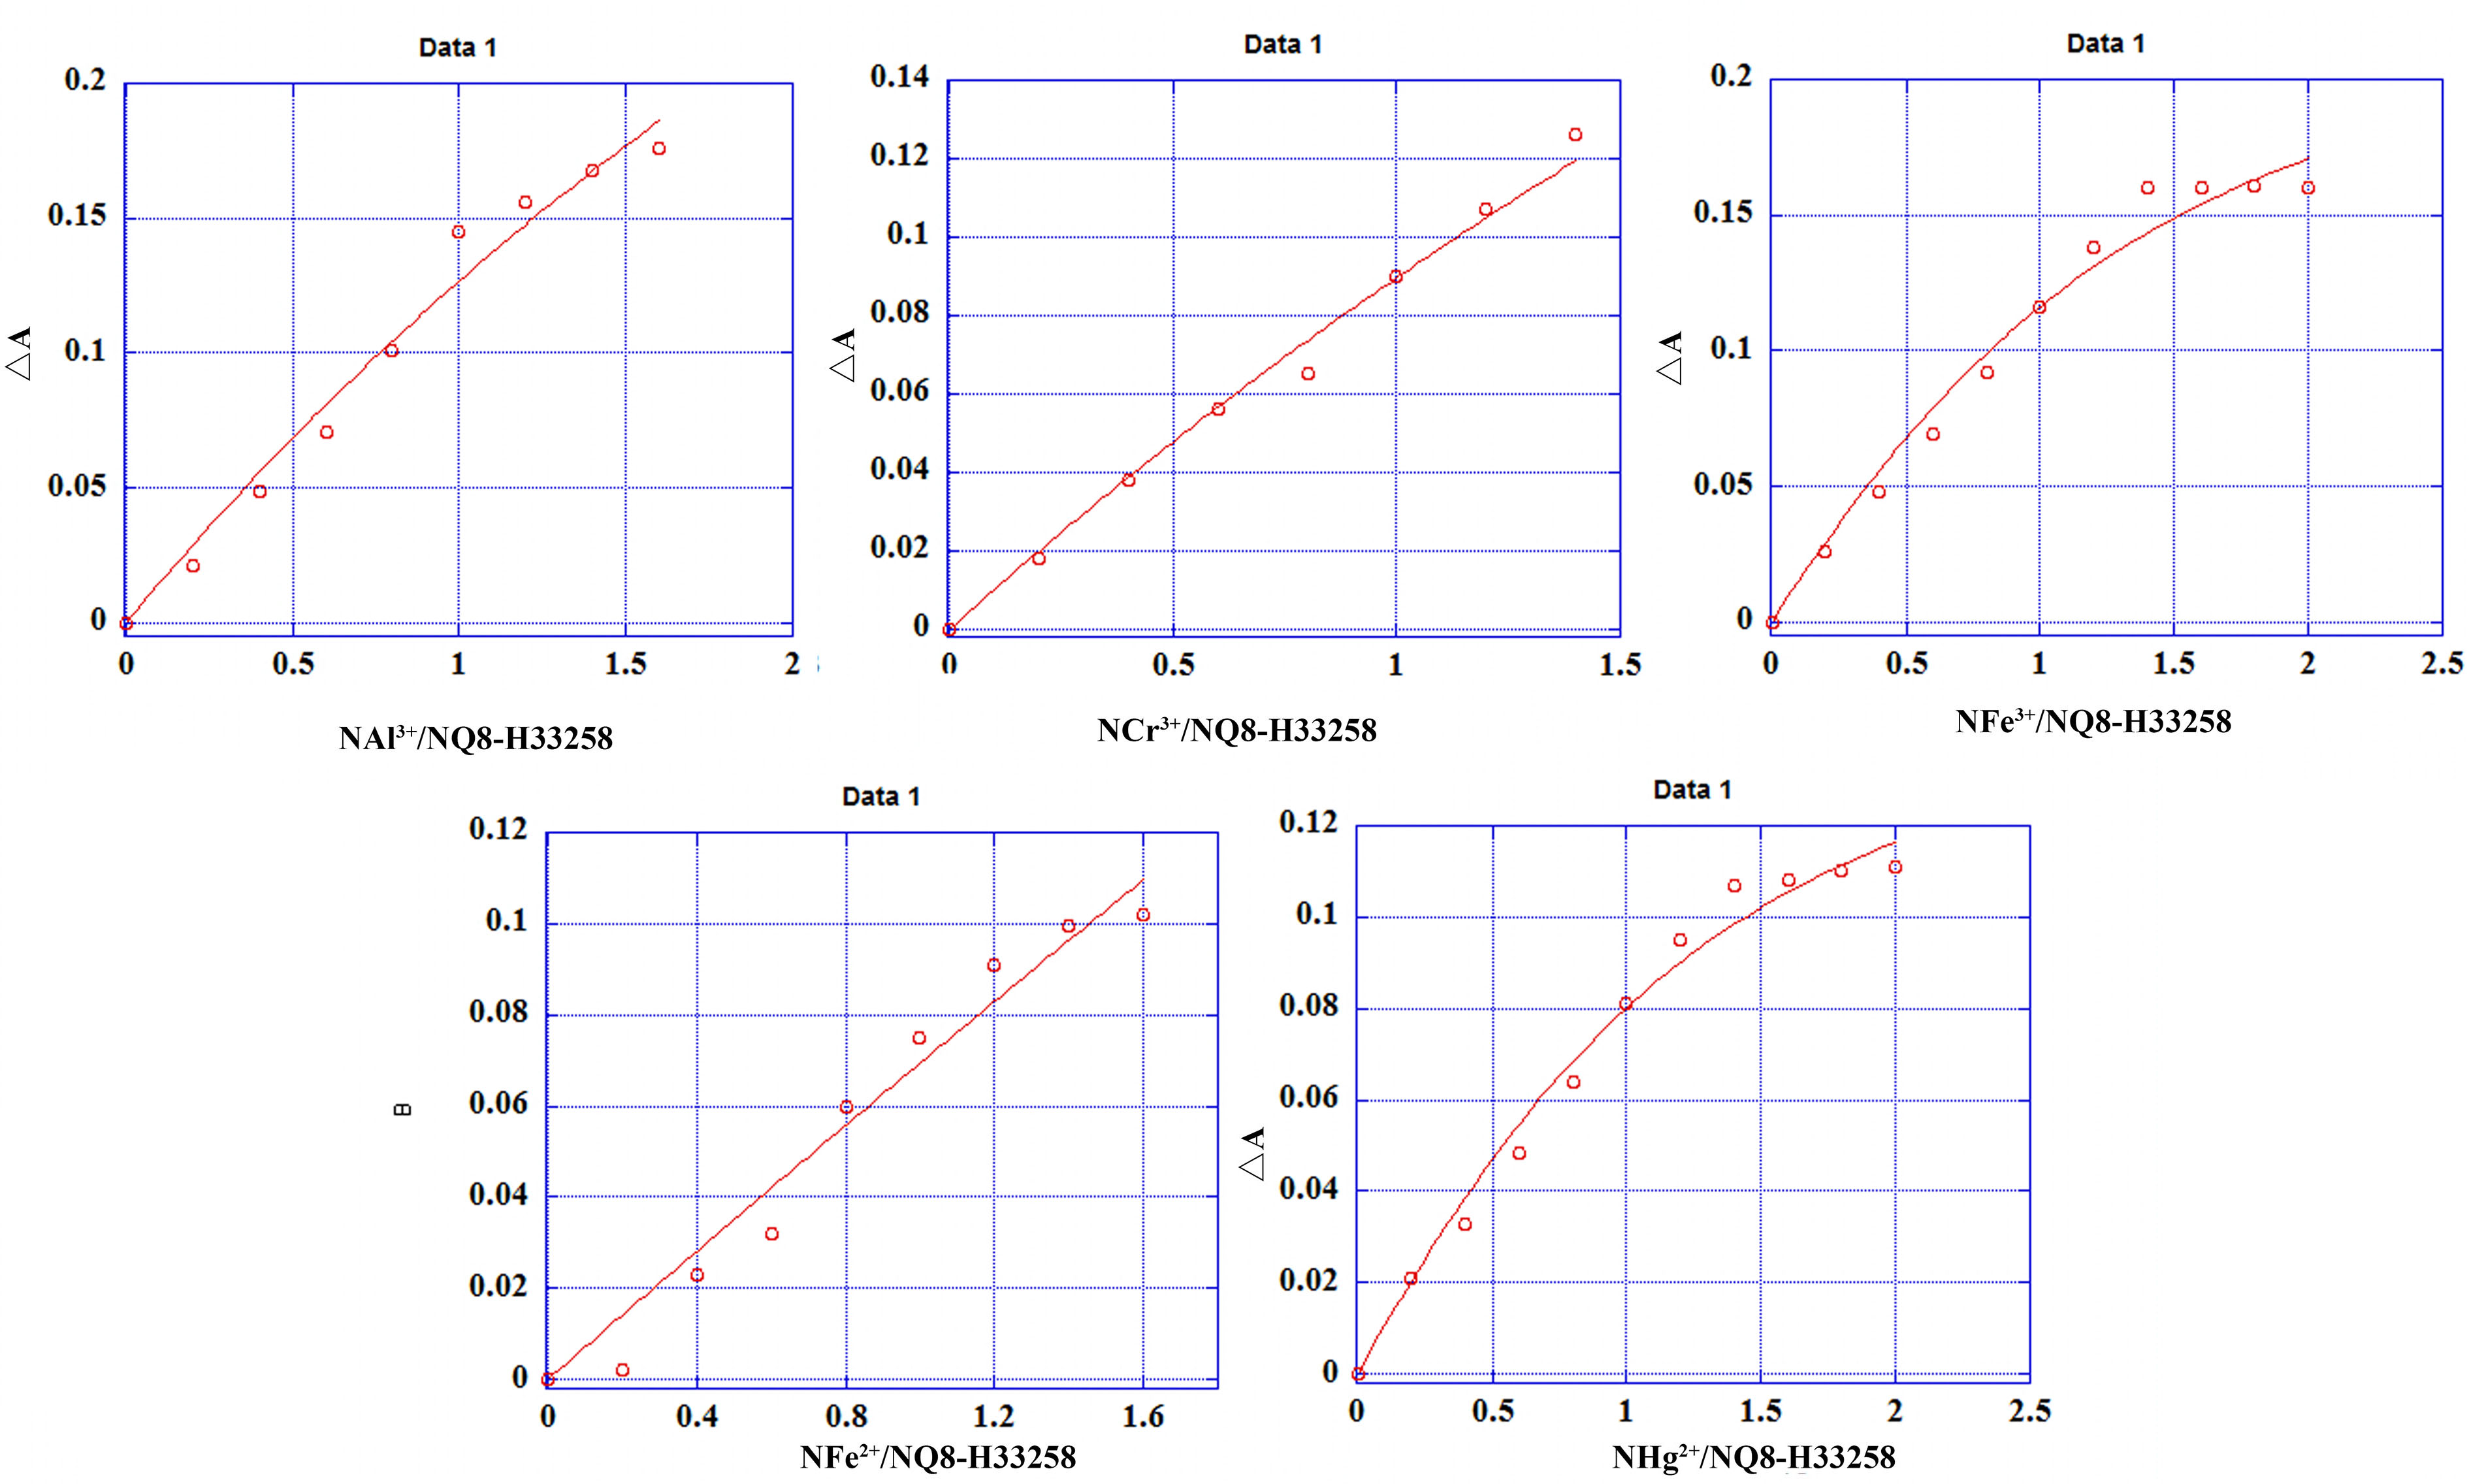


**Figure S5.** Titration absorption spectra of (left) the H33258@Q[8] inclusion complex (1:2; 10 μM) and (right) H33258 (10 μM) with Al3+, Cr3+, Fe3+, Fe2+, Hg2+, cations at pH=7.2, and nonlinear fitting curves for changes in the absorbance of the H33258@Q[8] inclusion complex (1:2; 10 μM) in the presence of different concentrations of Al3+, Cr3+, Fe3+, Fe2+, Hg2+, cations at pH=7.2.


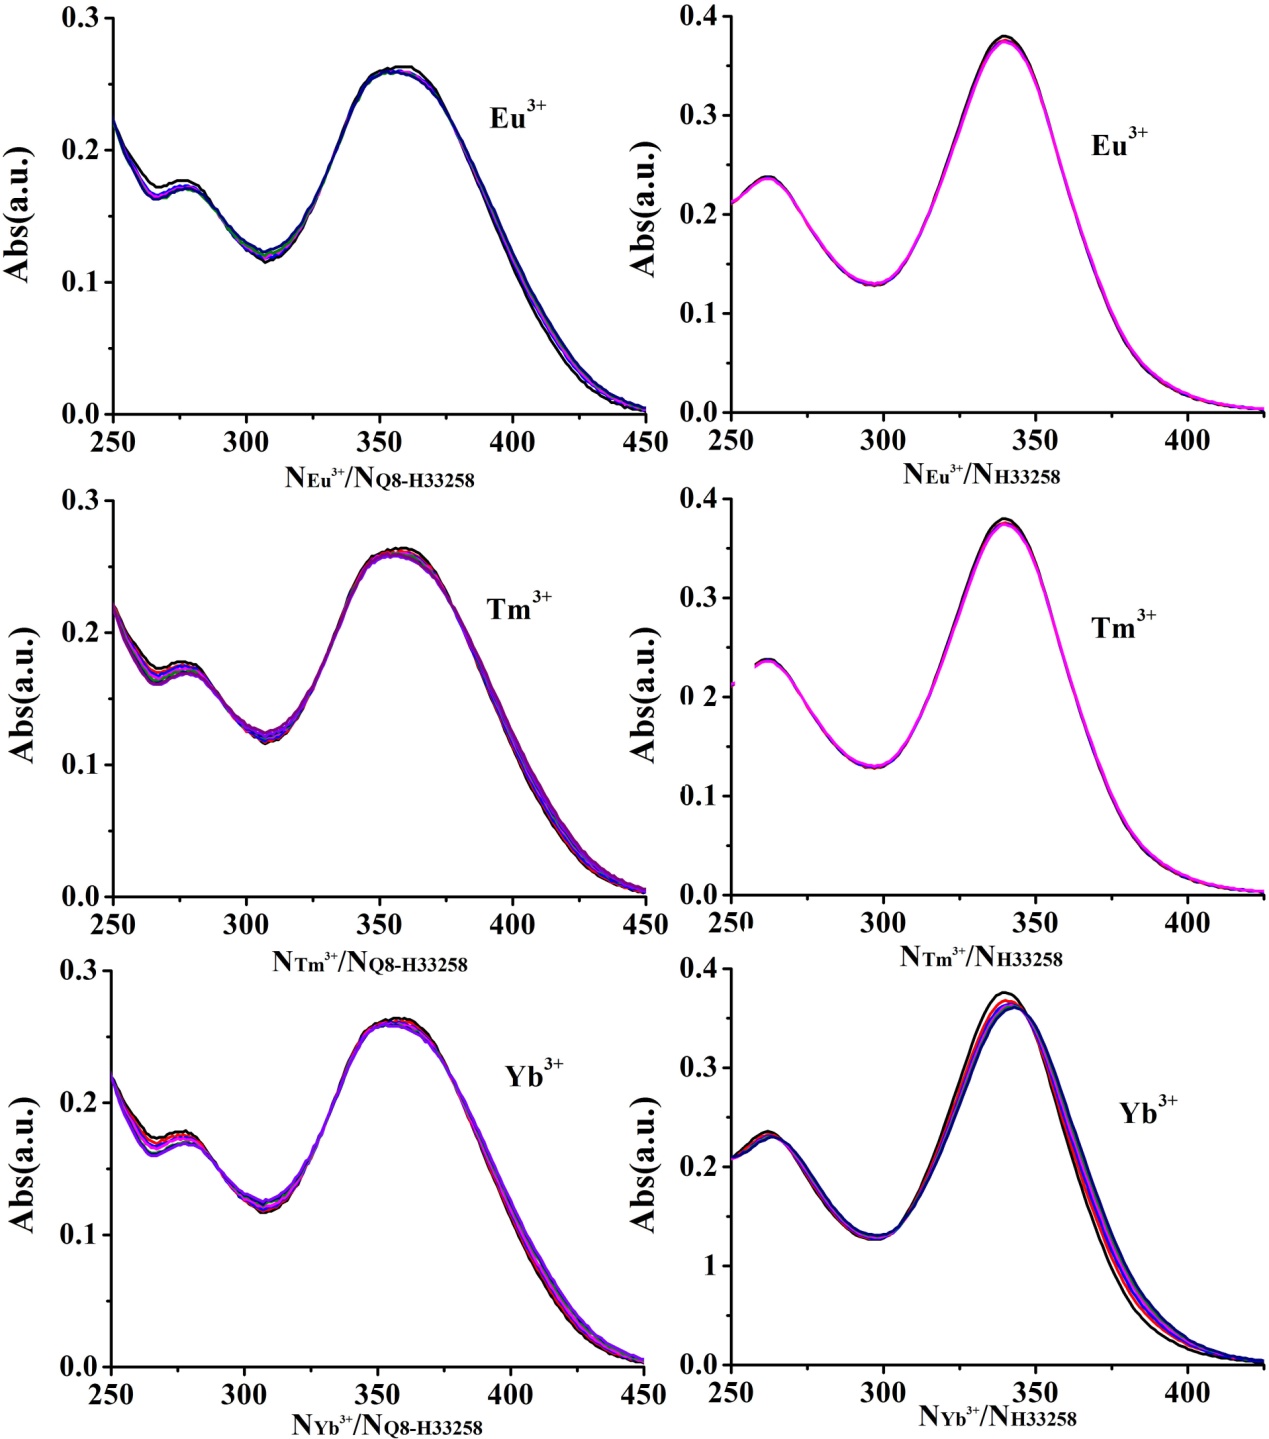


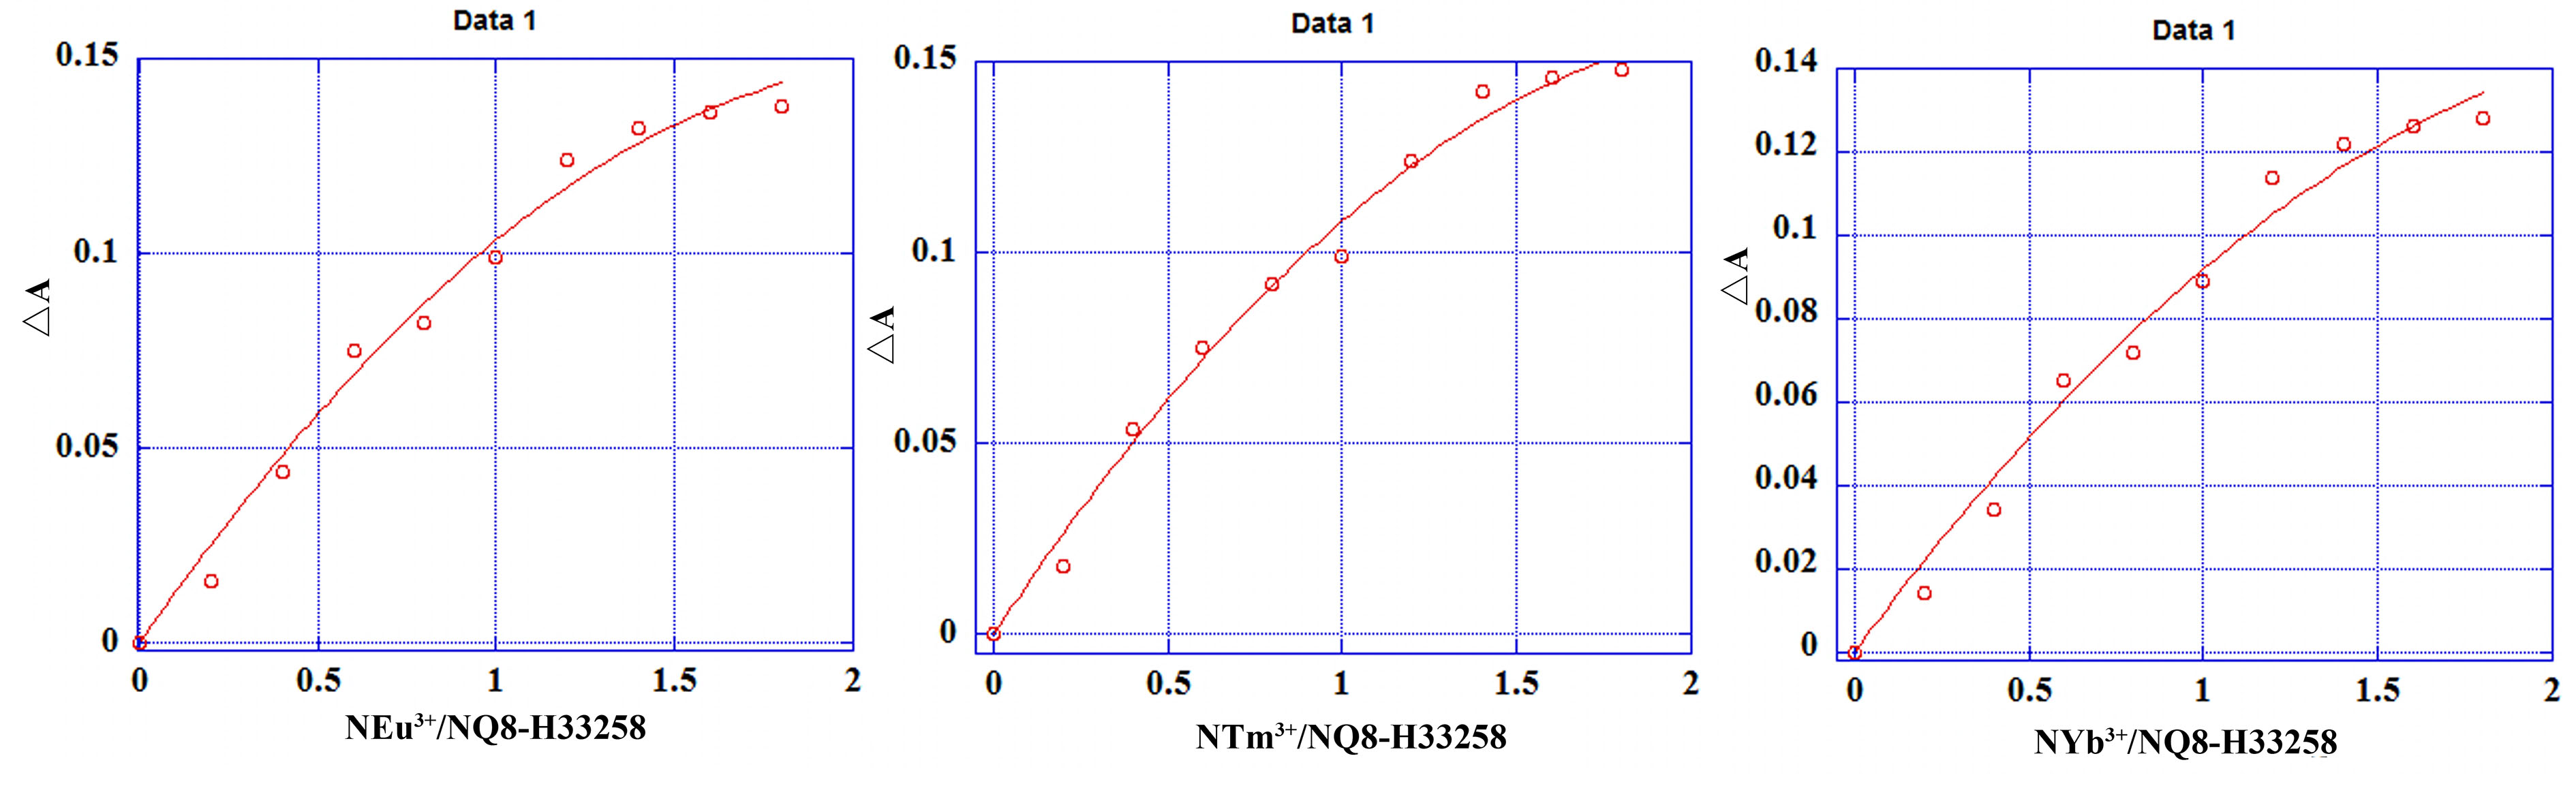


**Figure S6.** Titration absorption spectra of (left) the H33258@Q[8] inclusion complex (1:2; 10 μM) and (right) H33258 (20 μM) with Eu3+, Tm3+, Yb3+ cations at pH=7.2, and nonlinear fitting curves for changes in the absorbance of the H33258@Q[8] inclusion complex (1:2; 10 μM) in the presence of different concentrations of Eu3+, Tm3+, Yb3+, cations at pH=7.2.


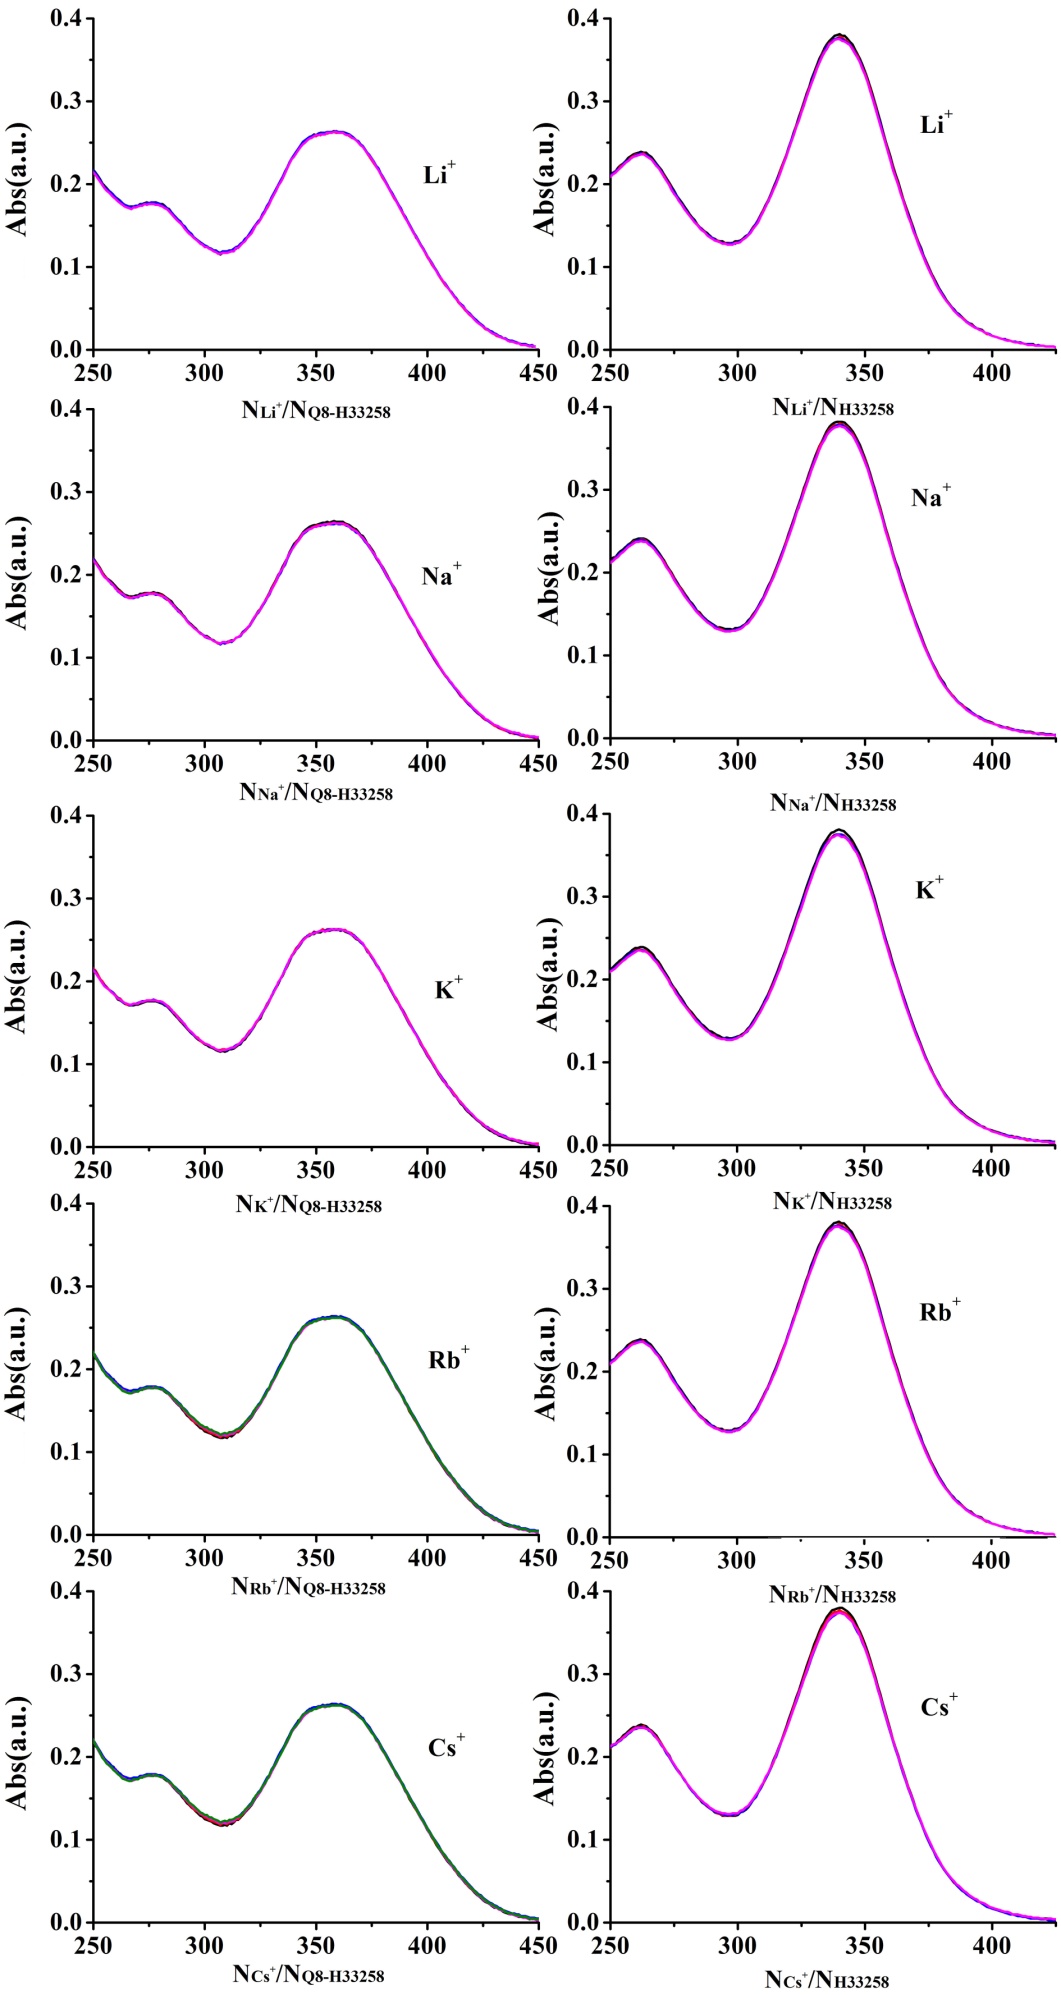


**Figure S7.** Titration absorption spectra of (left) the H33258@Q[8] inclusion complex (1:2; 10 μM) and (right) H33258 (20 μM) with A+ cations at pH=7.2.


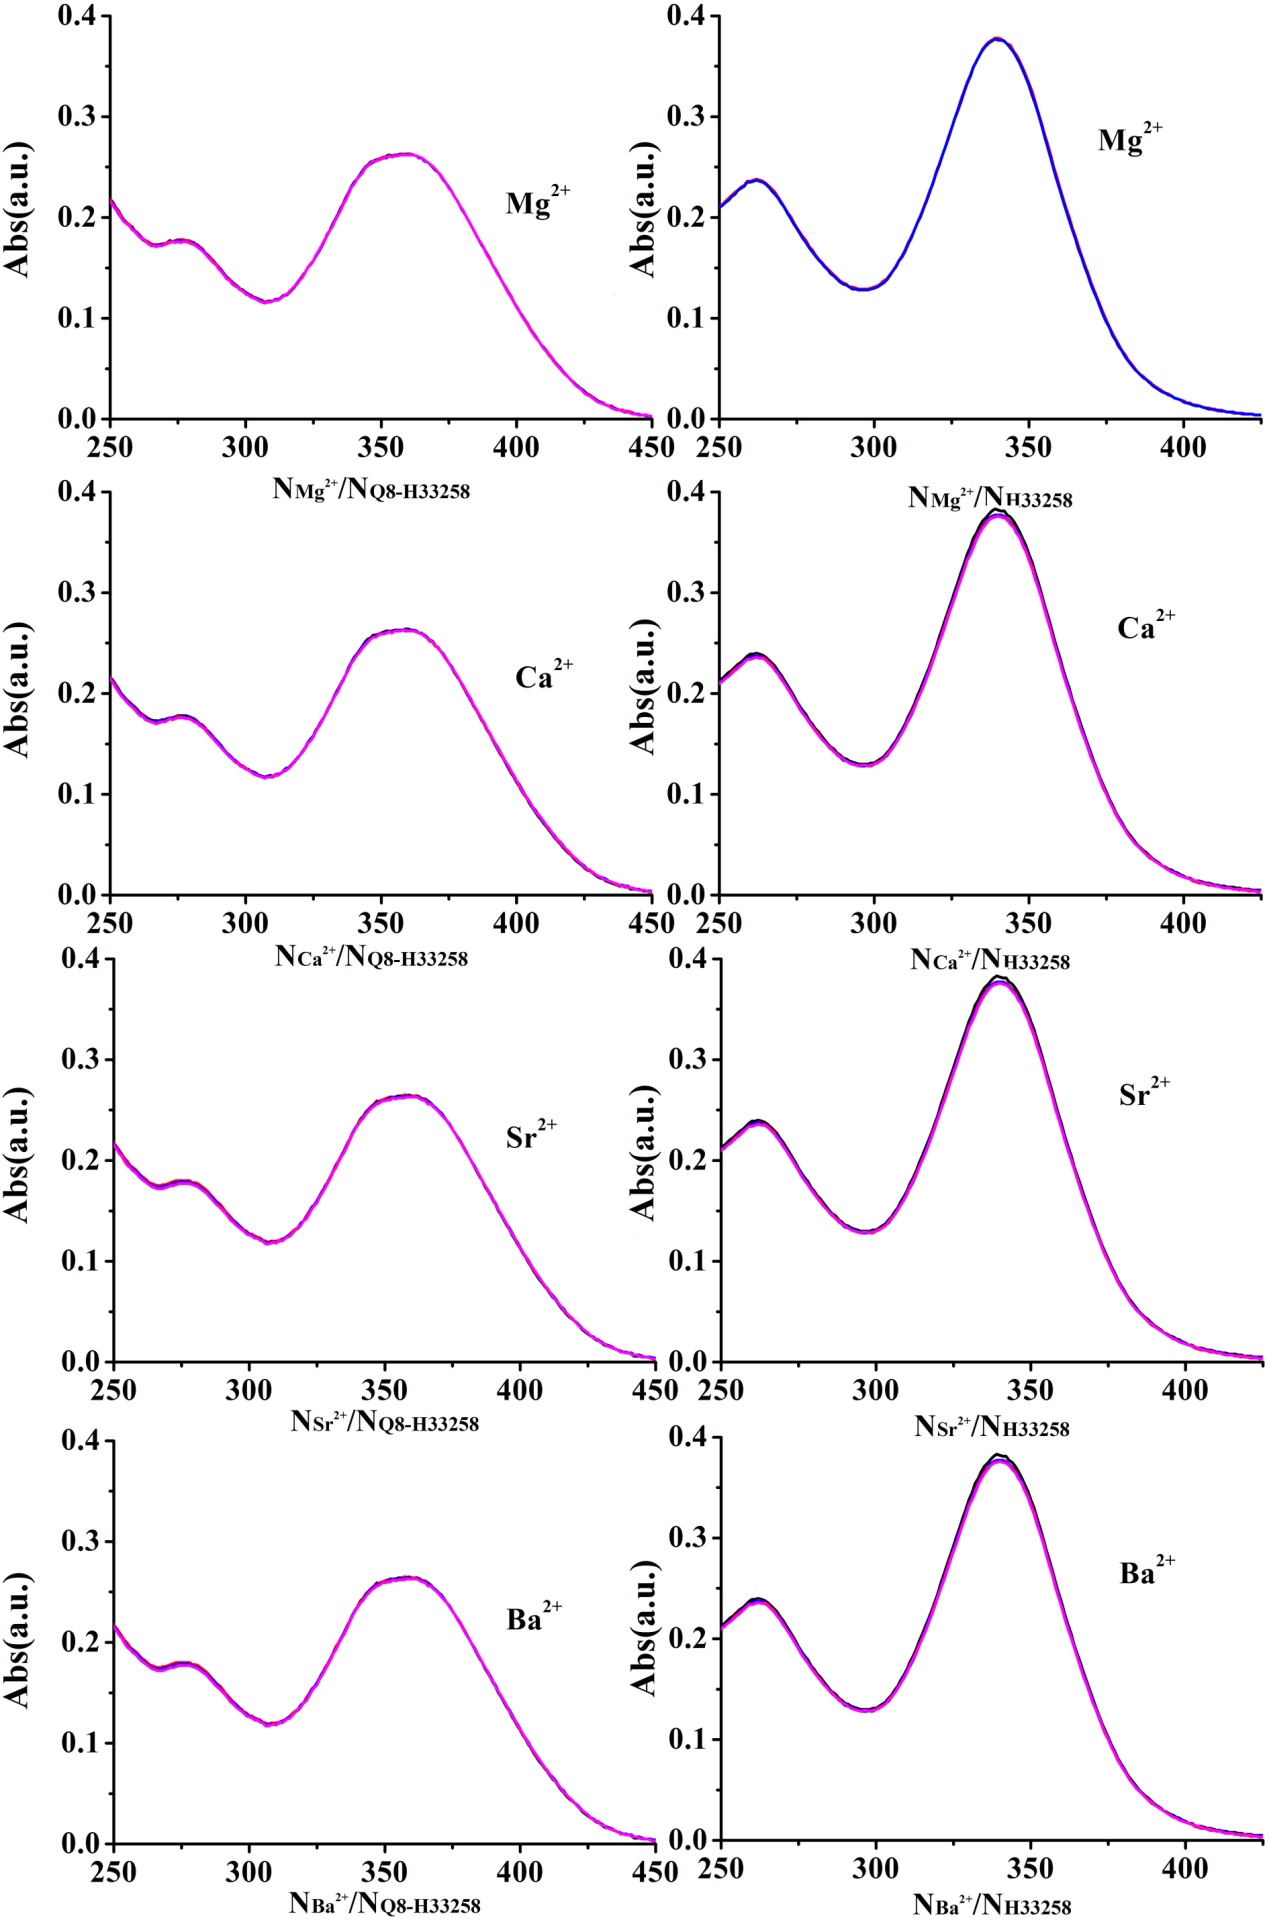


**Figure S8.** Titration absorption spectra of (left) the H33258@Q[8] inclusion complex (1:2; 10 μM) and (right) H33258 (20 μM) with AE2+ cations at pH=7.2.


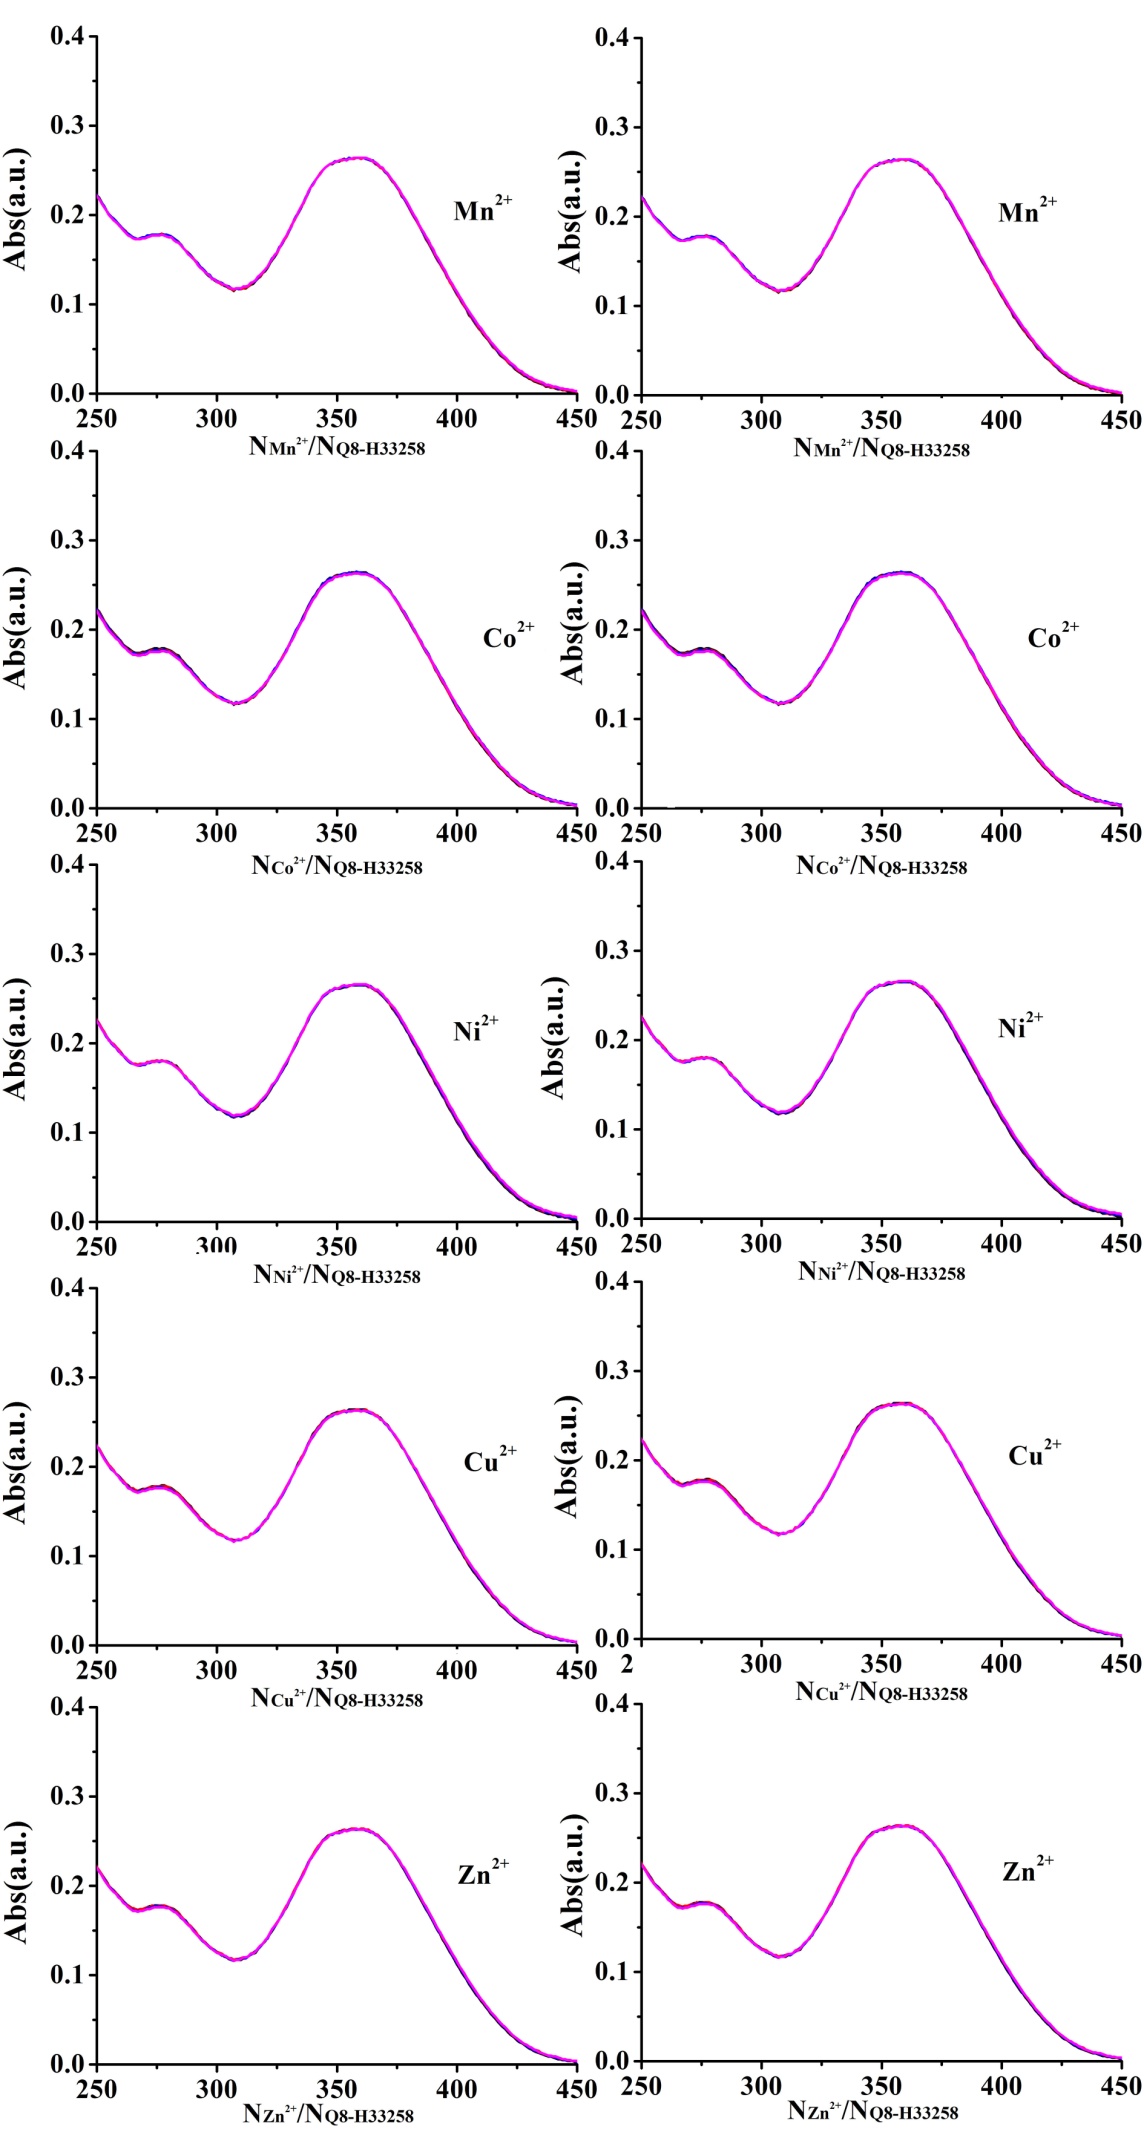

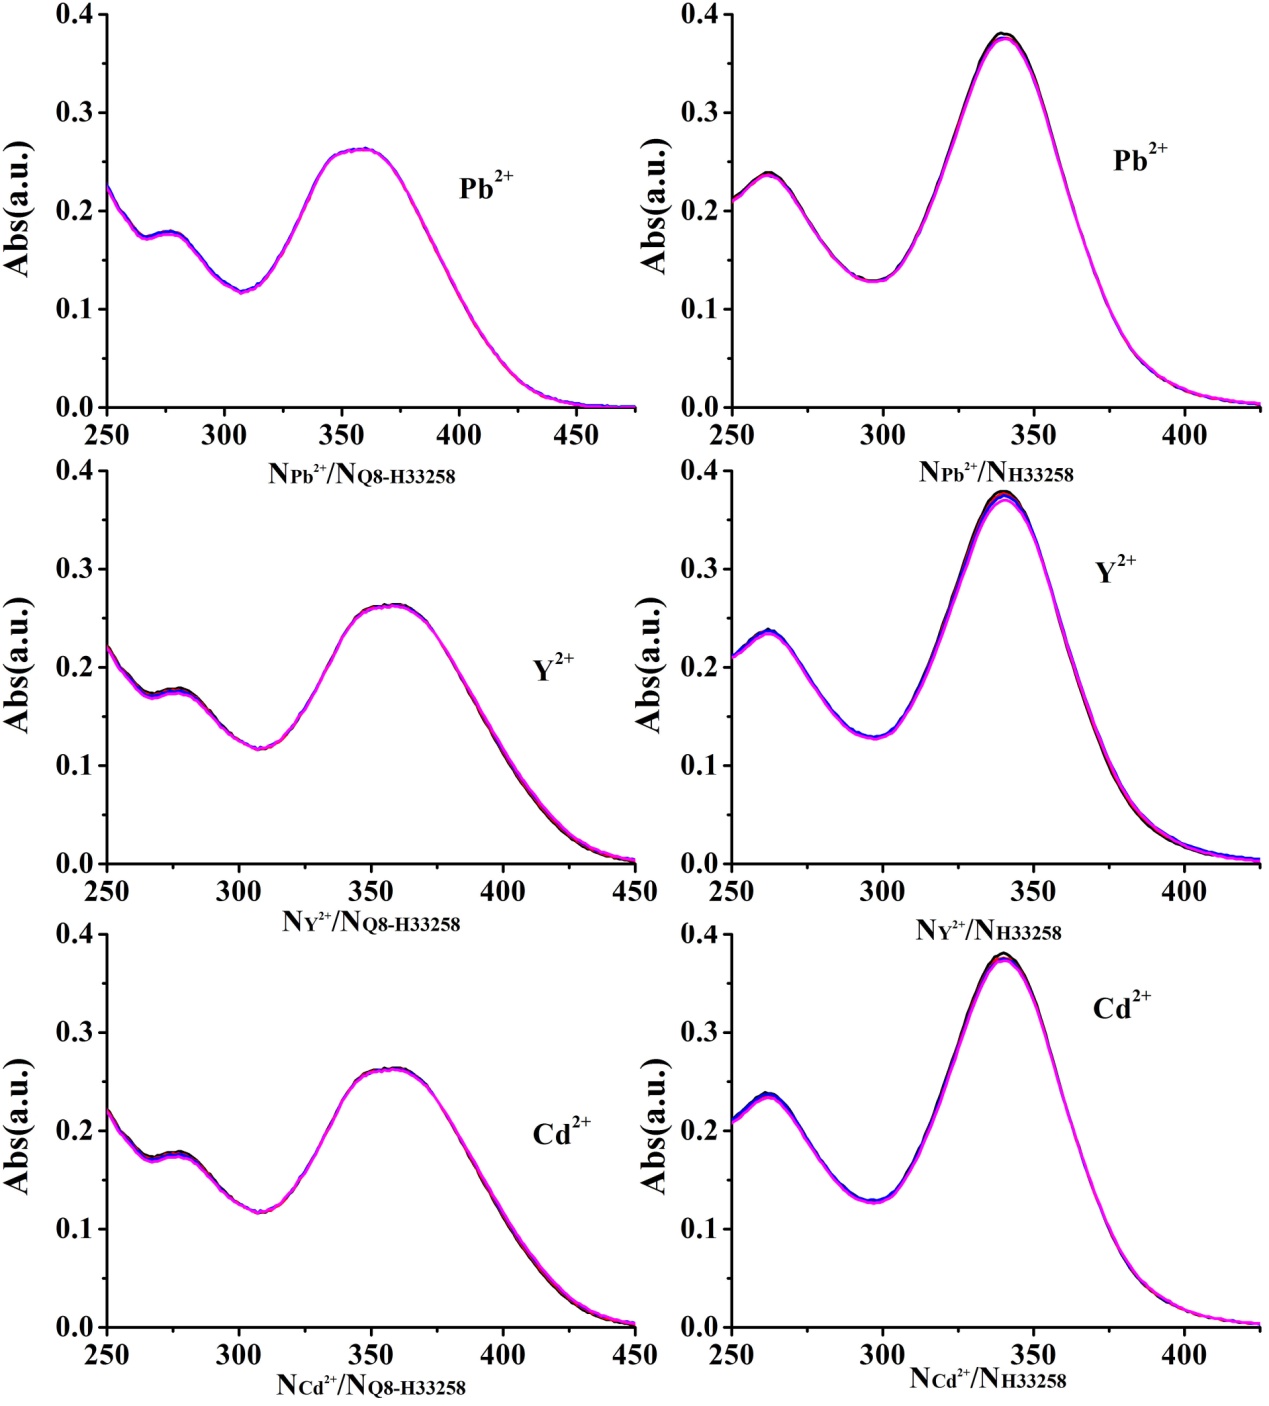


**Figure S9.** Titration absorption spectra of (left) the H33258@Q[8] inclusion complex (1:2; 10 μM) and (right) H33258 (20 μM) with Trn+ cations at pH=7.2.


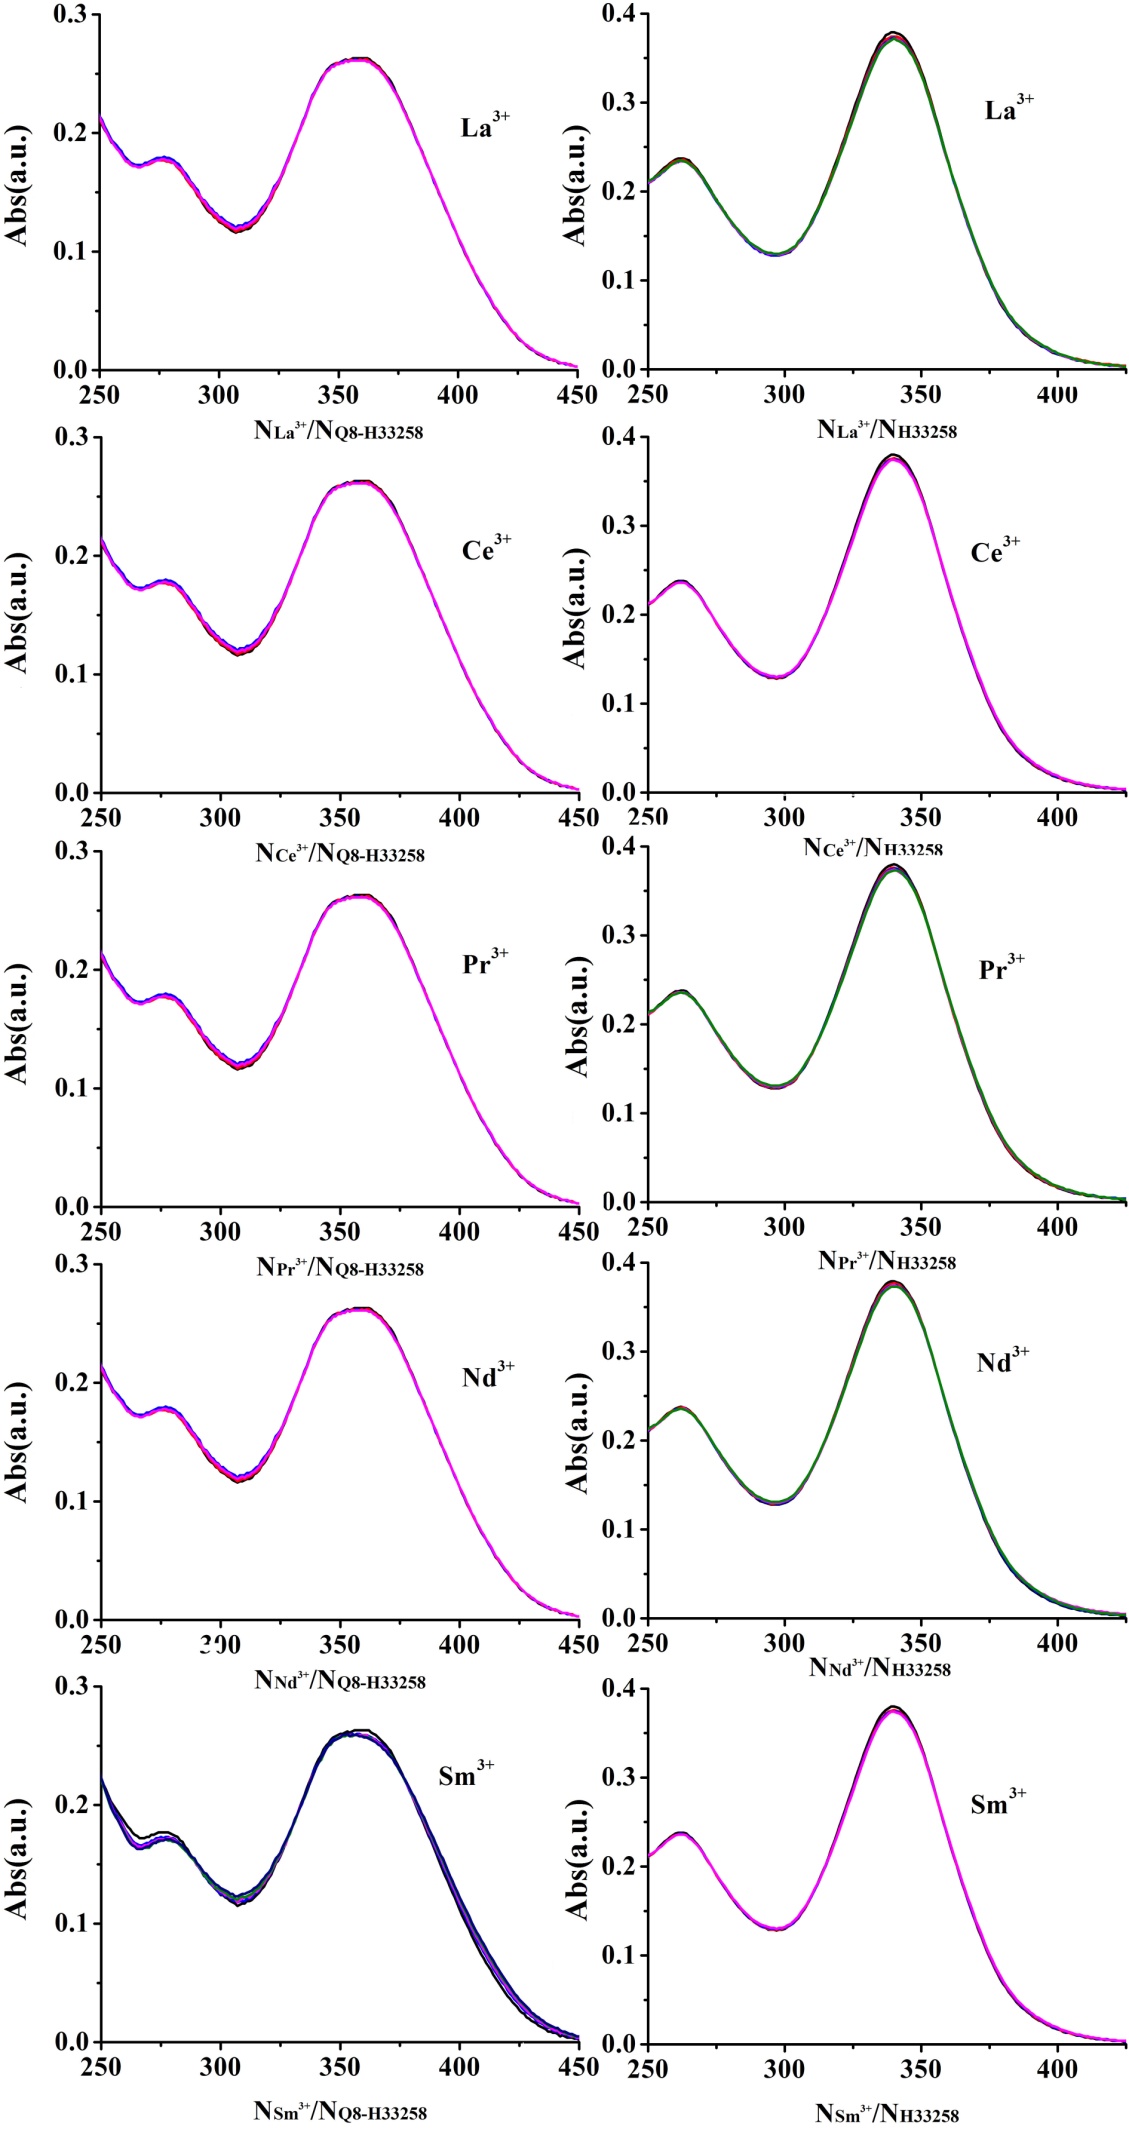

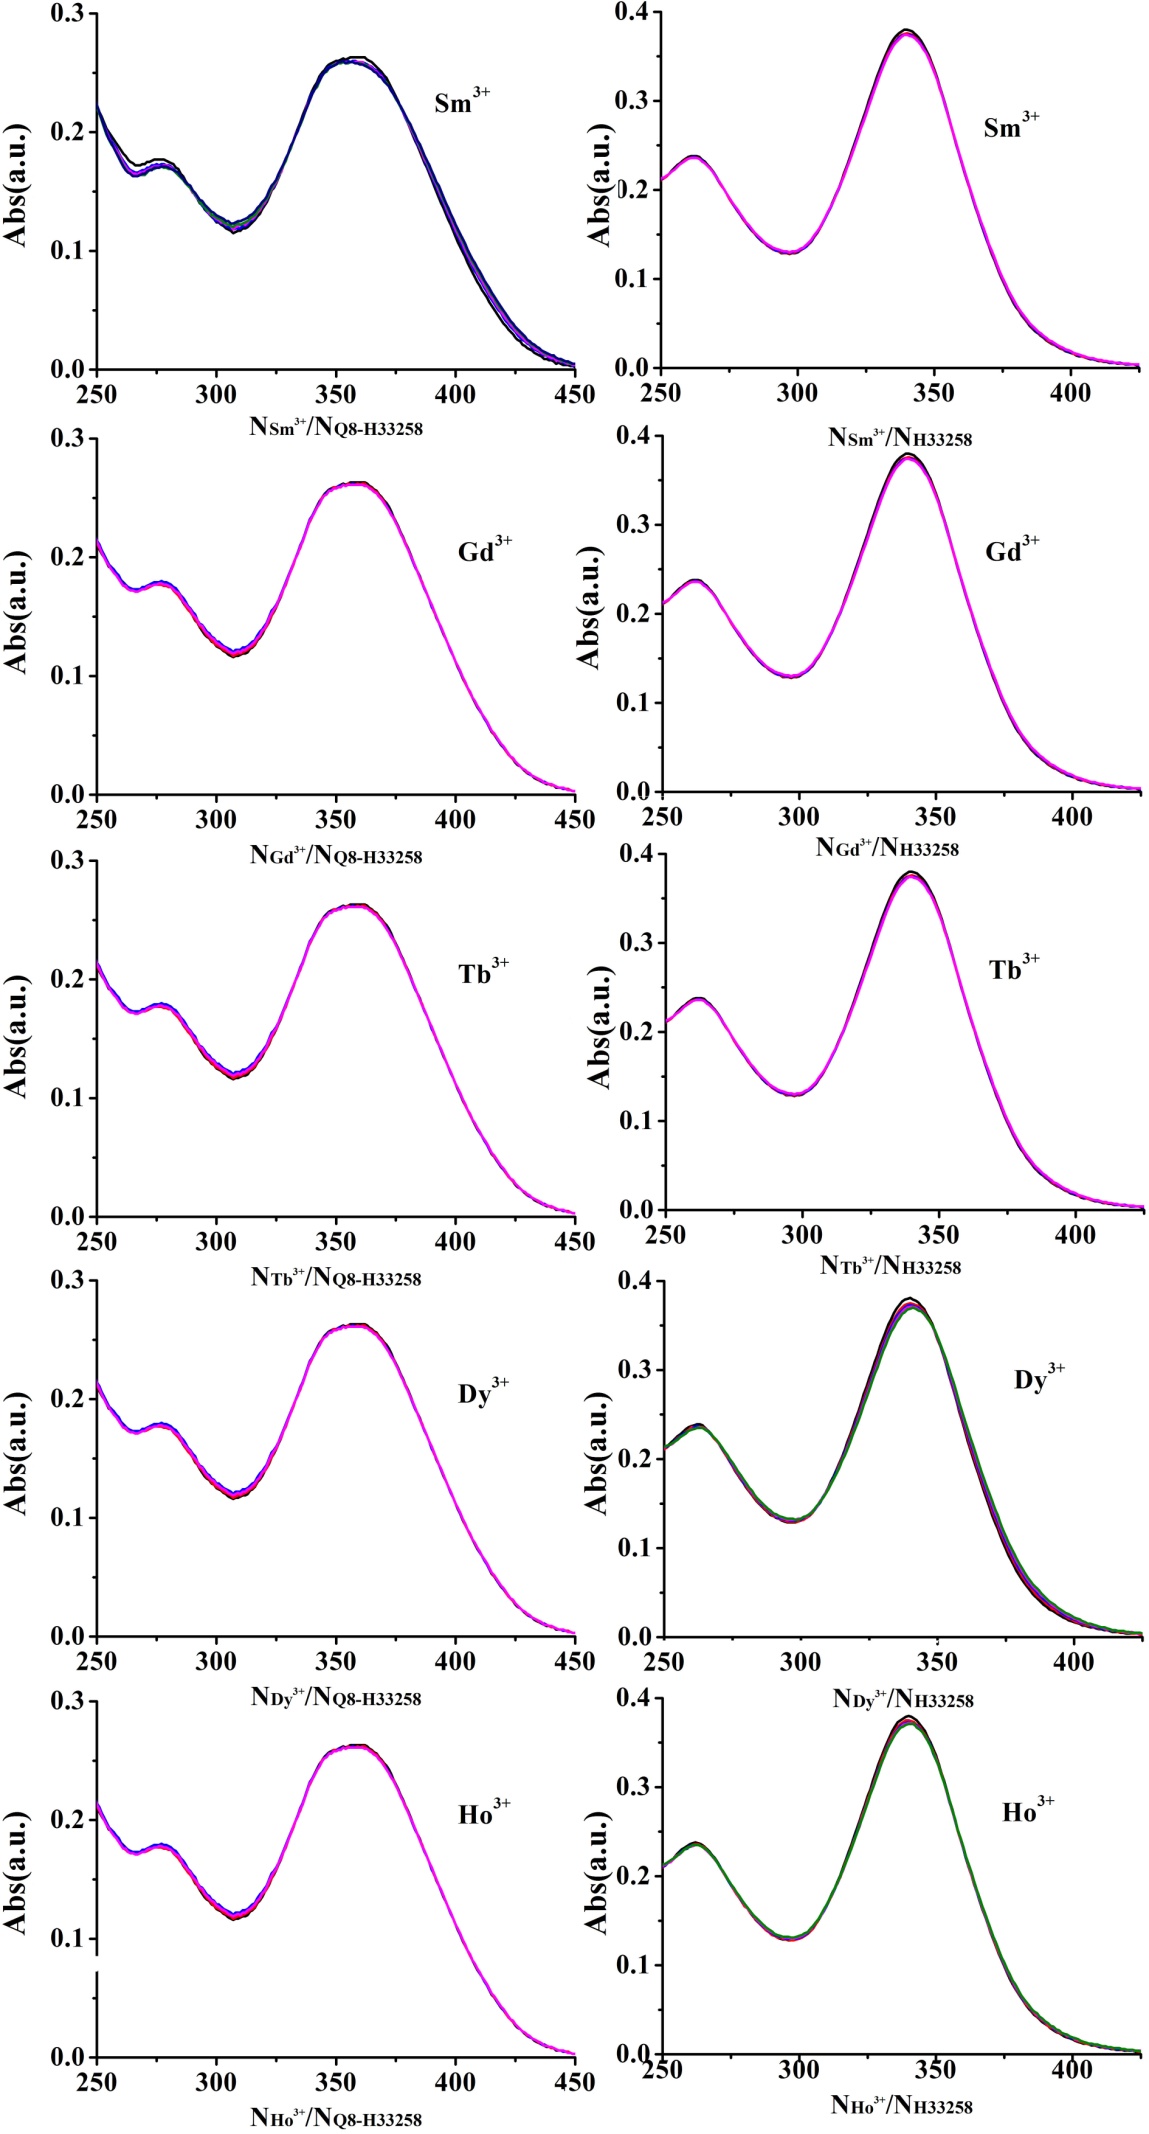

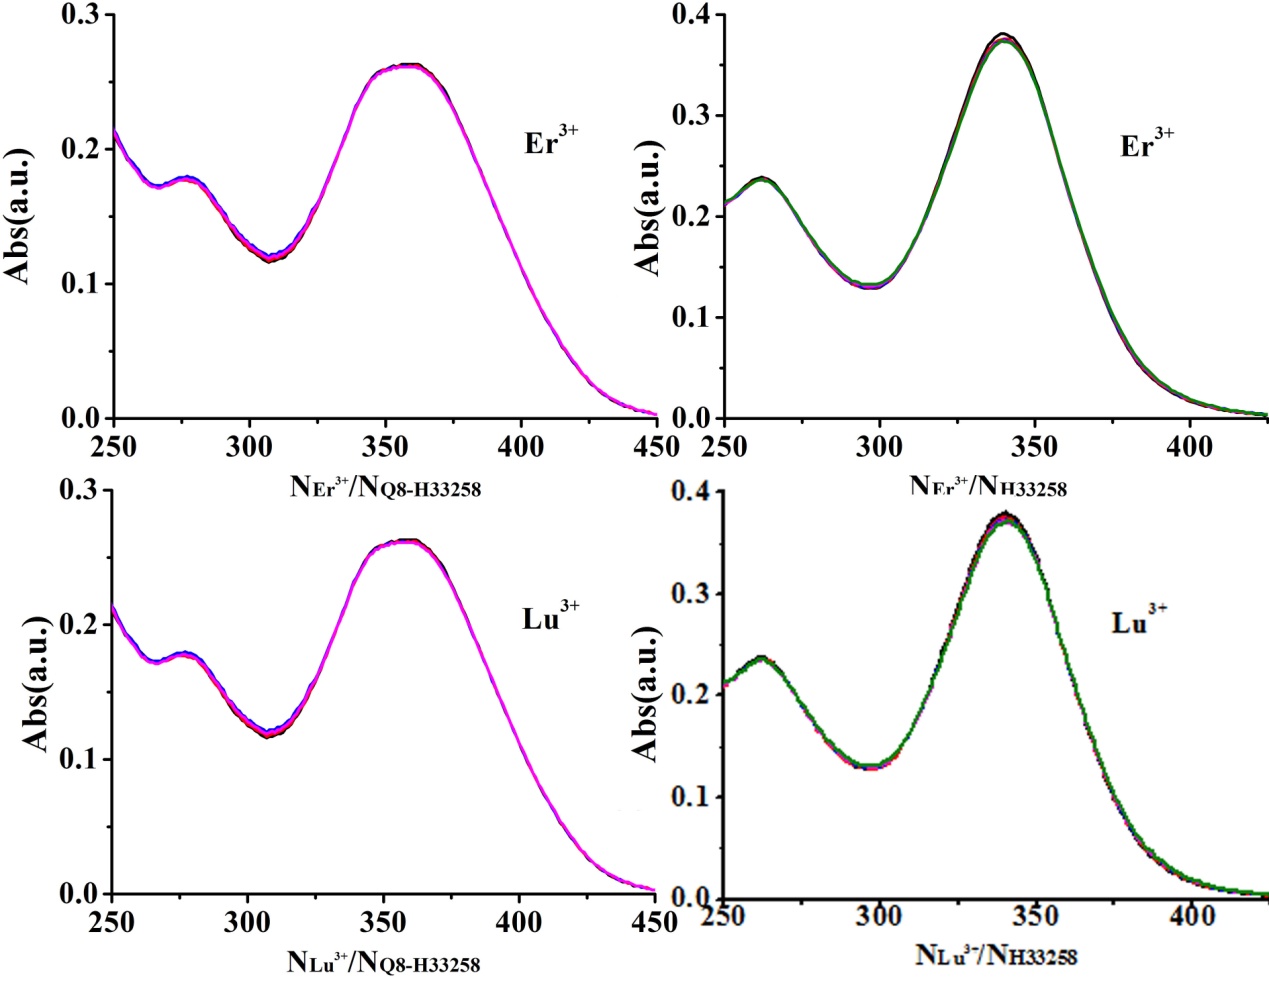


**Figure S10.** Titration absorption spectra of (left) the H33258@Q[8] inclusion complex (1:2; 10 μM) and (right) H33258 (20 μM) with Ln3+ cations at pH=7.2.


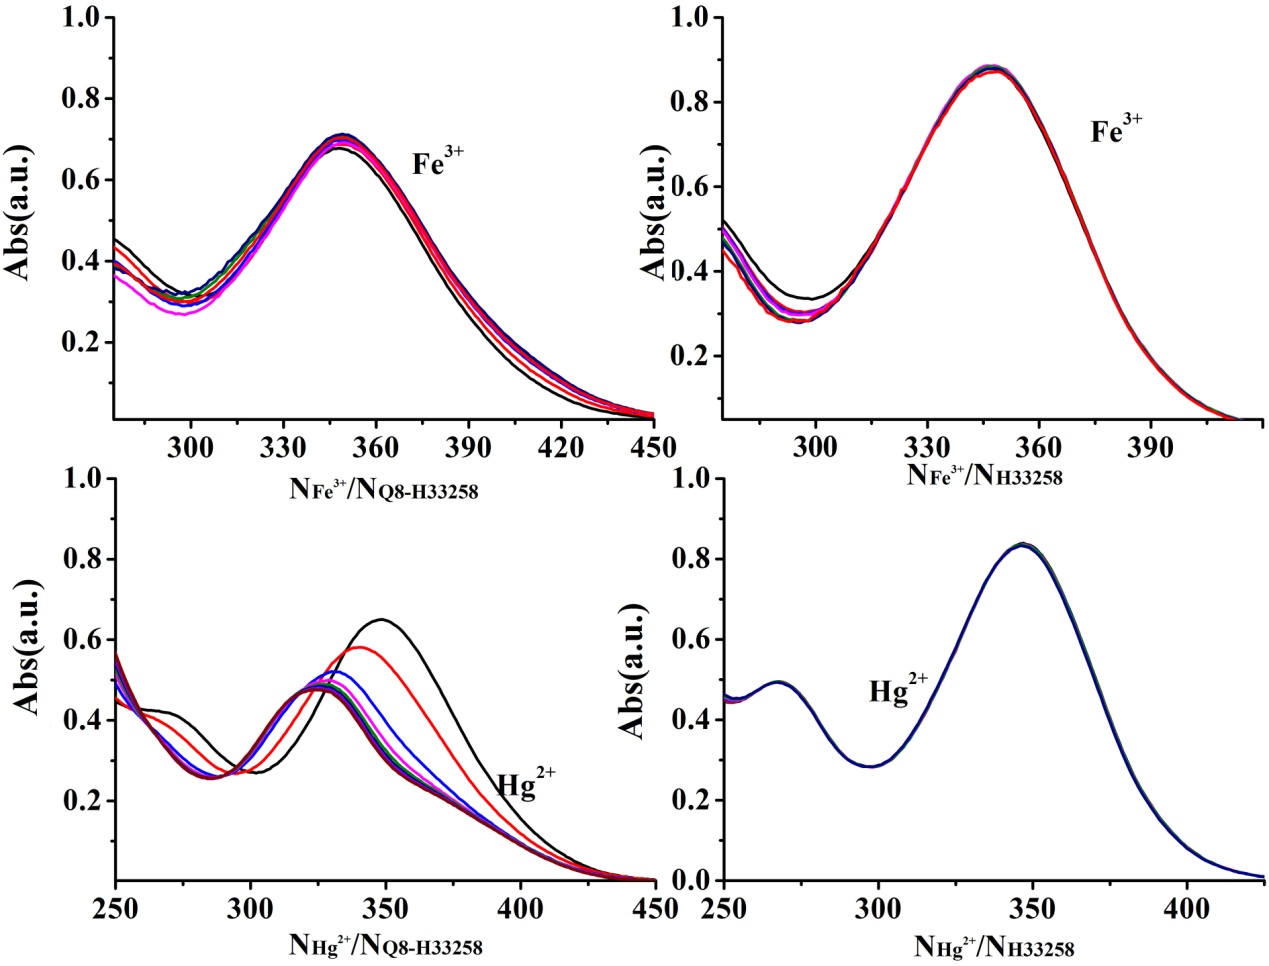


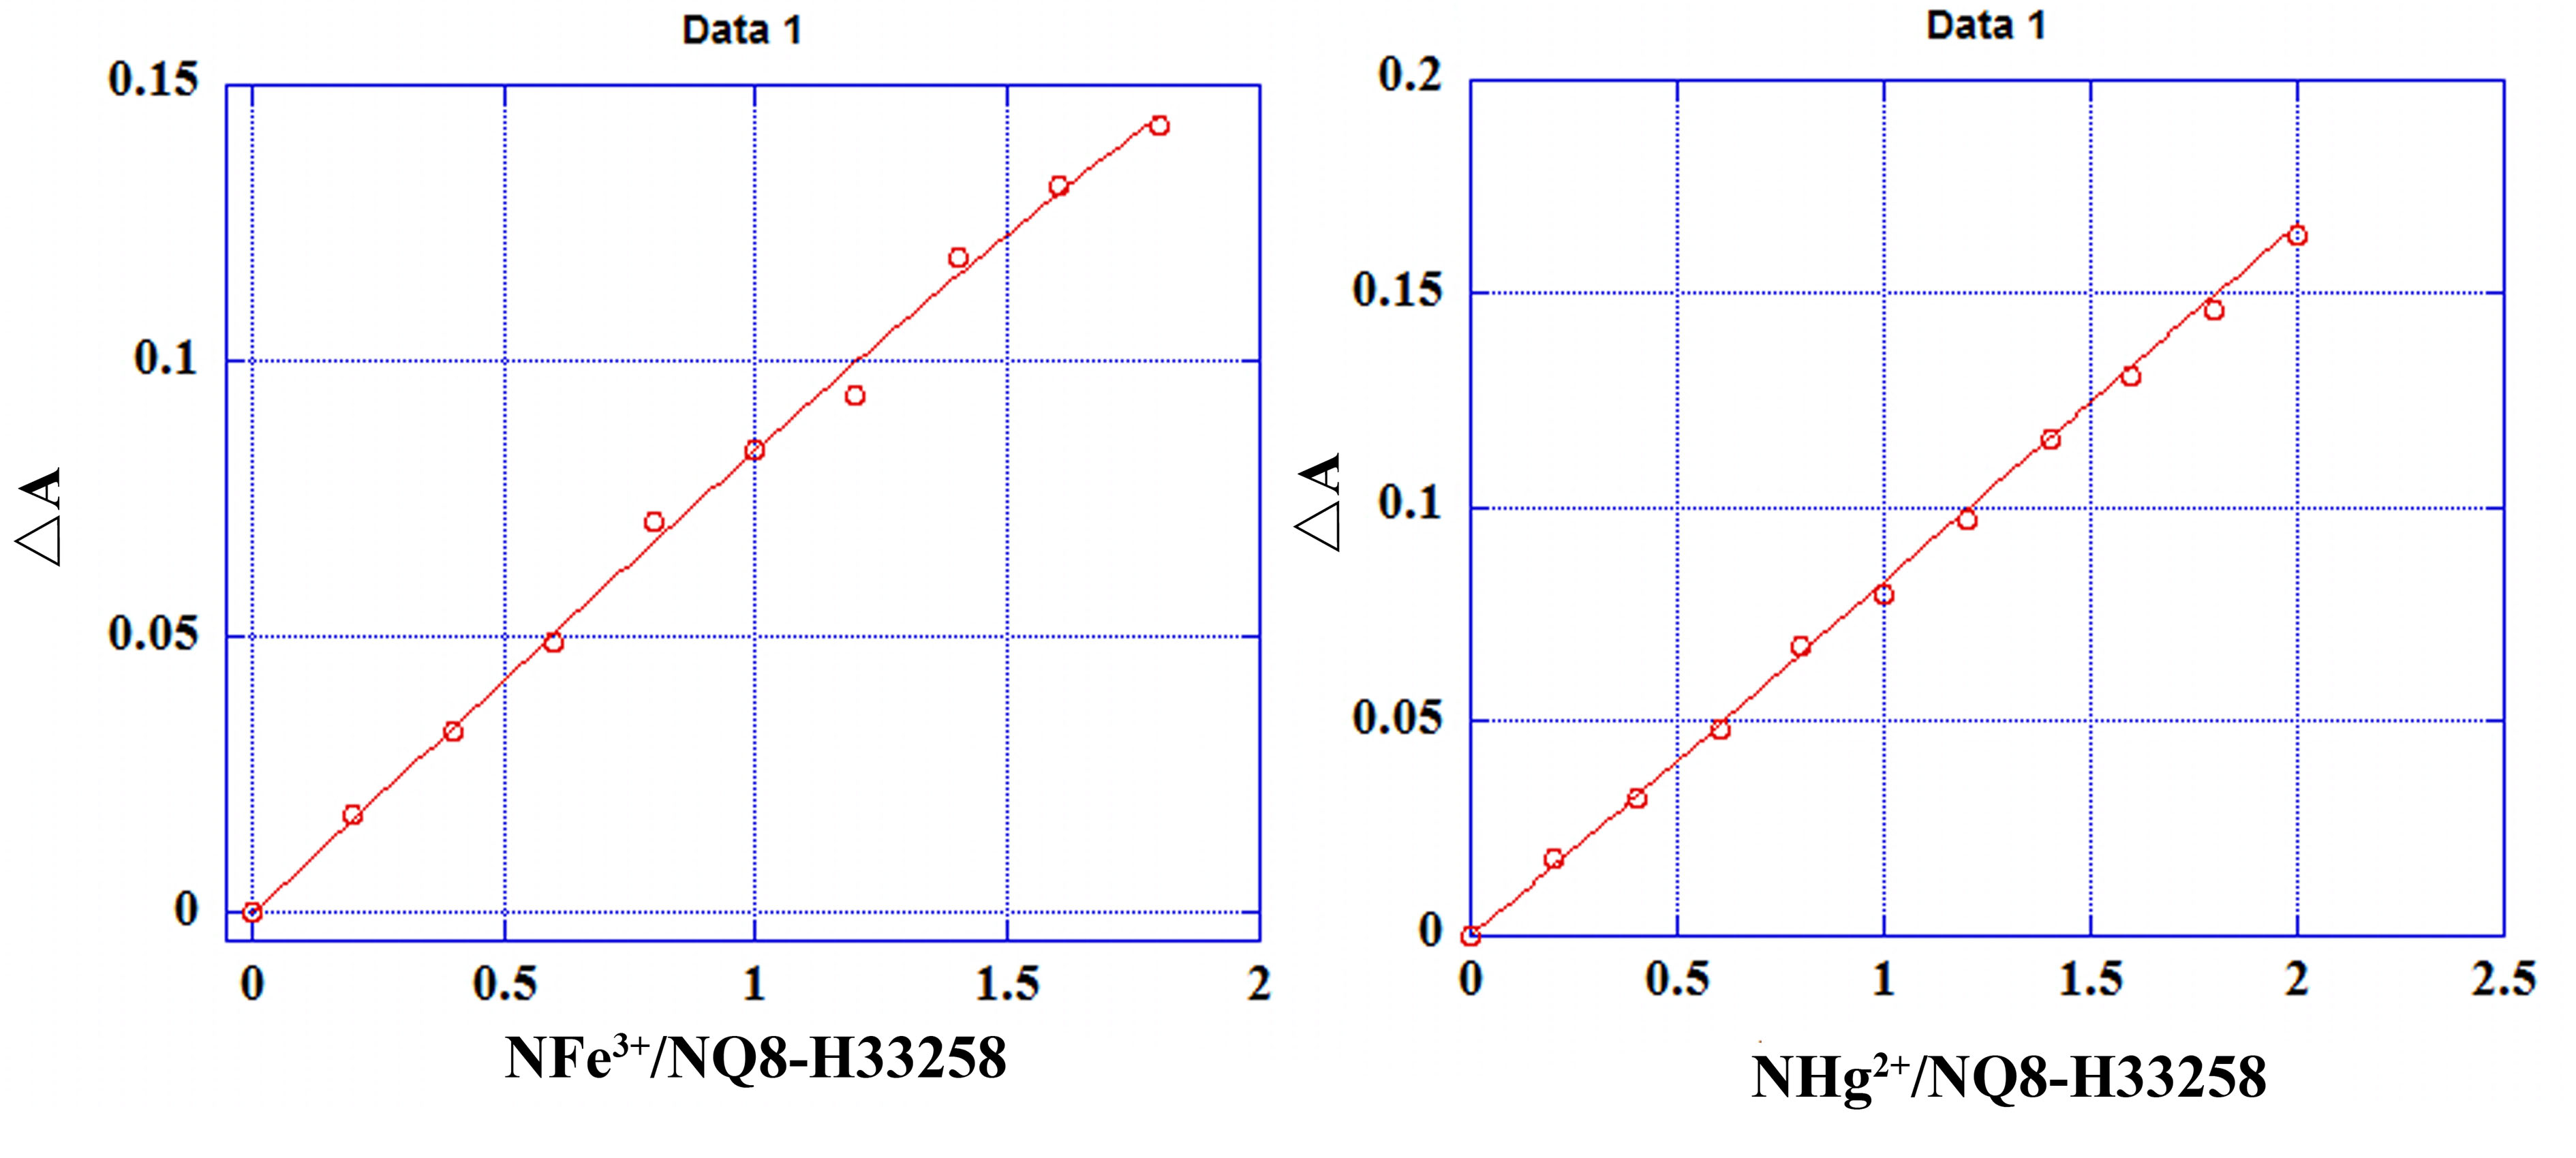


**Figure S11.** Titration absorption spectra of (left) the H33258@Q[8] inclusion complex (2:1; 10 μM) and (right) H33258 (10 μM) with Fe3+, Hg2+ cations at pH=4.5, and nonlinear fitting curves for changes in the absorbance of the H33258@Q[8] inclusion complex (2:1; 10 μM) in the presence of different concentrations of Fe3+, Hg2+, cations at pH=4.5.


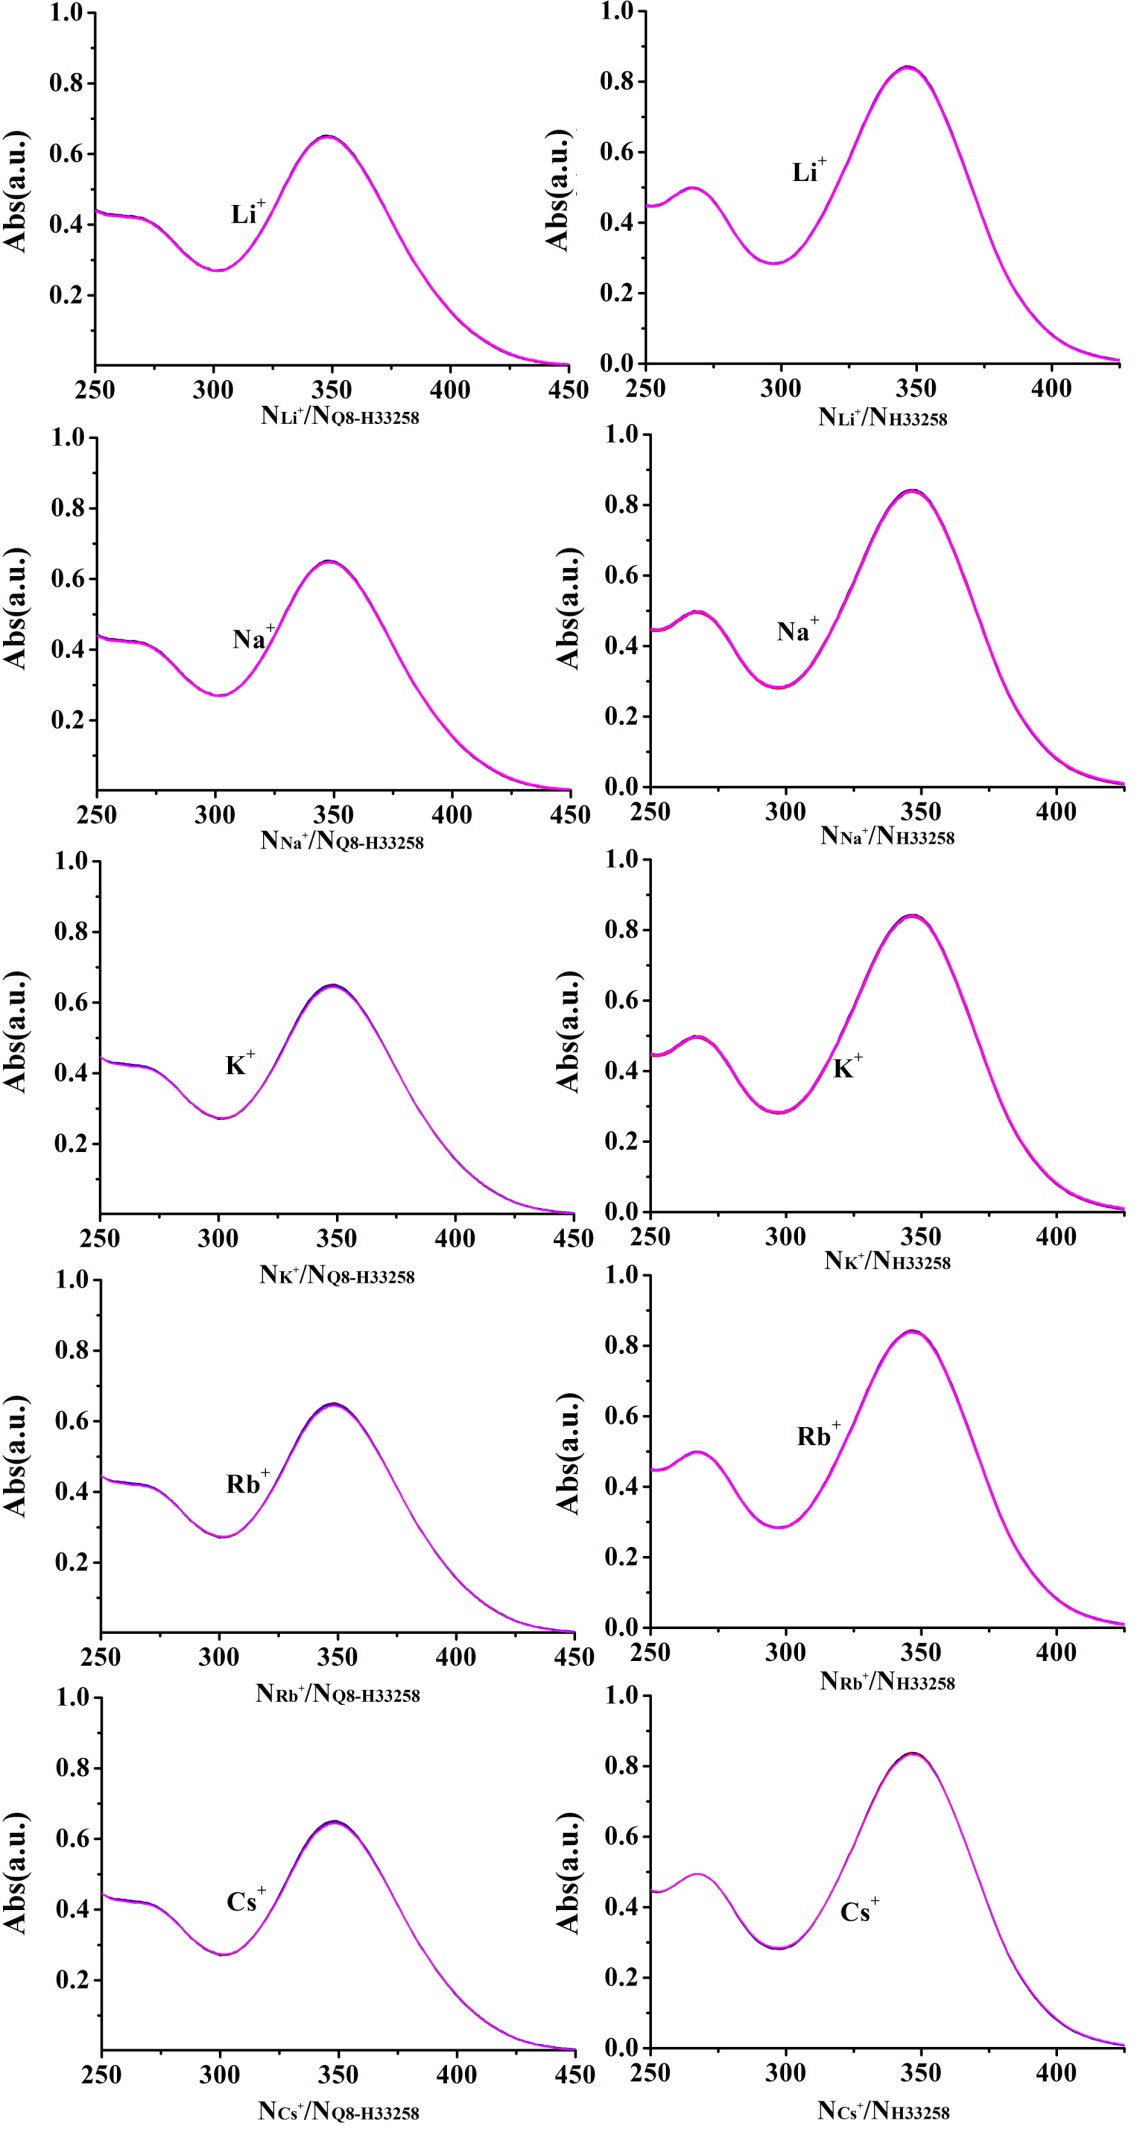


**Figure S12.** Titration absorption spectra of (left) the H33258@Q[8] inclusion complex (2:1; 10 μM) and (right) H33258 (20 μM) with A+ cations at pH=4.5.


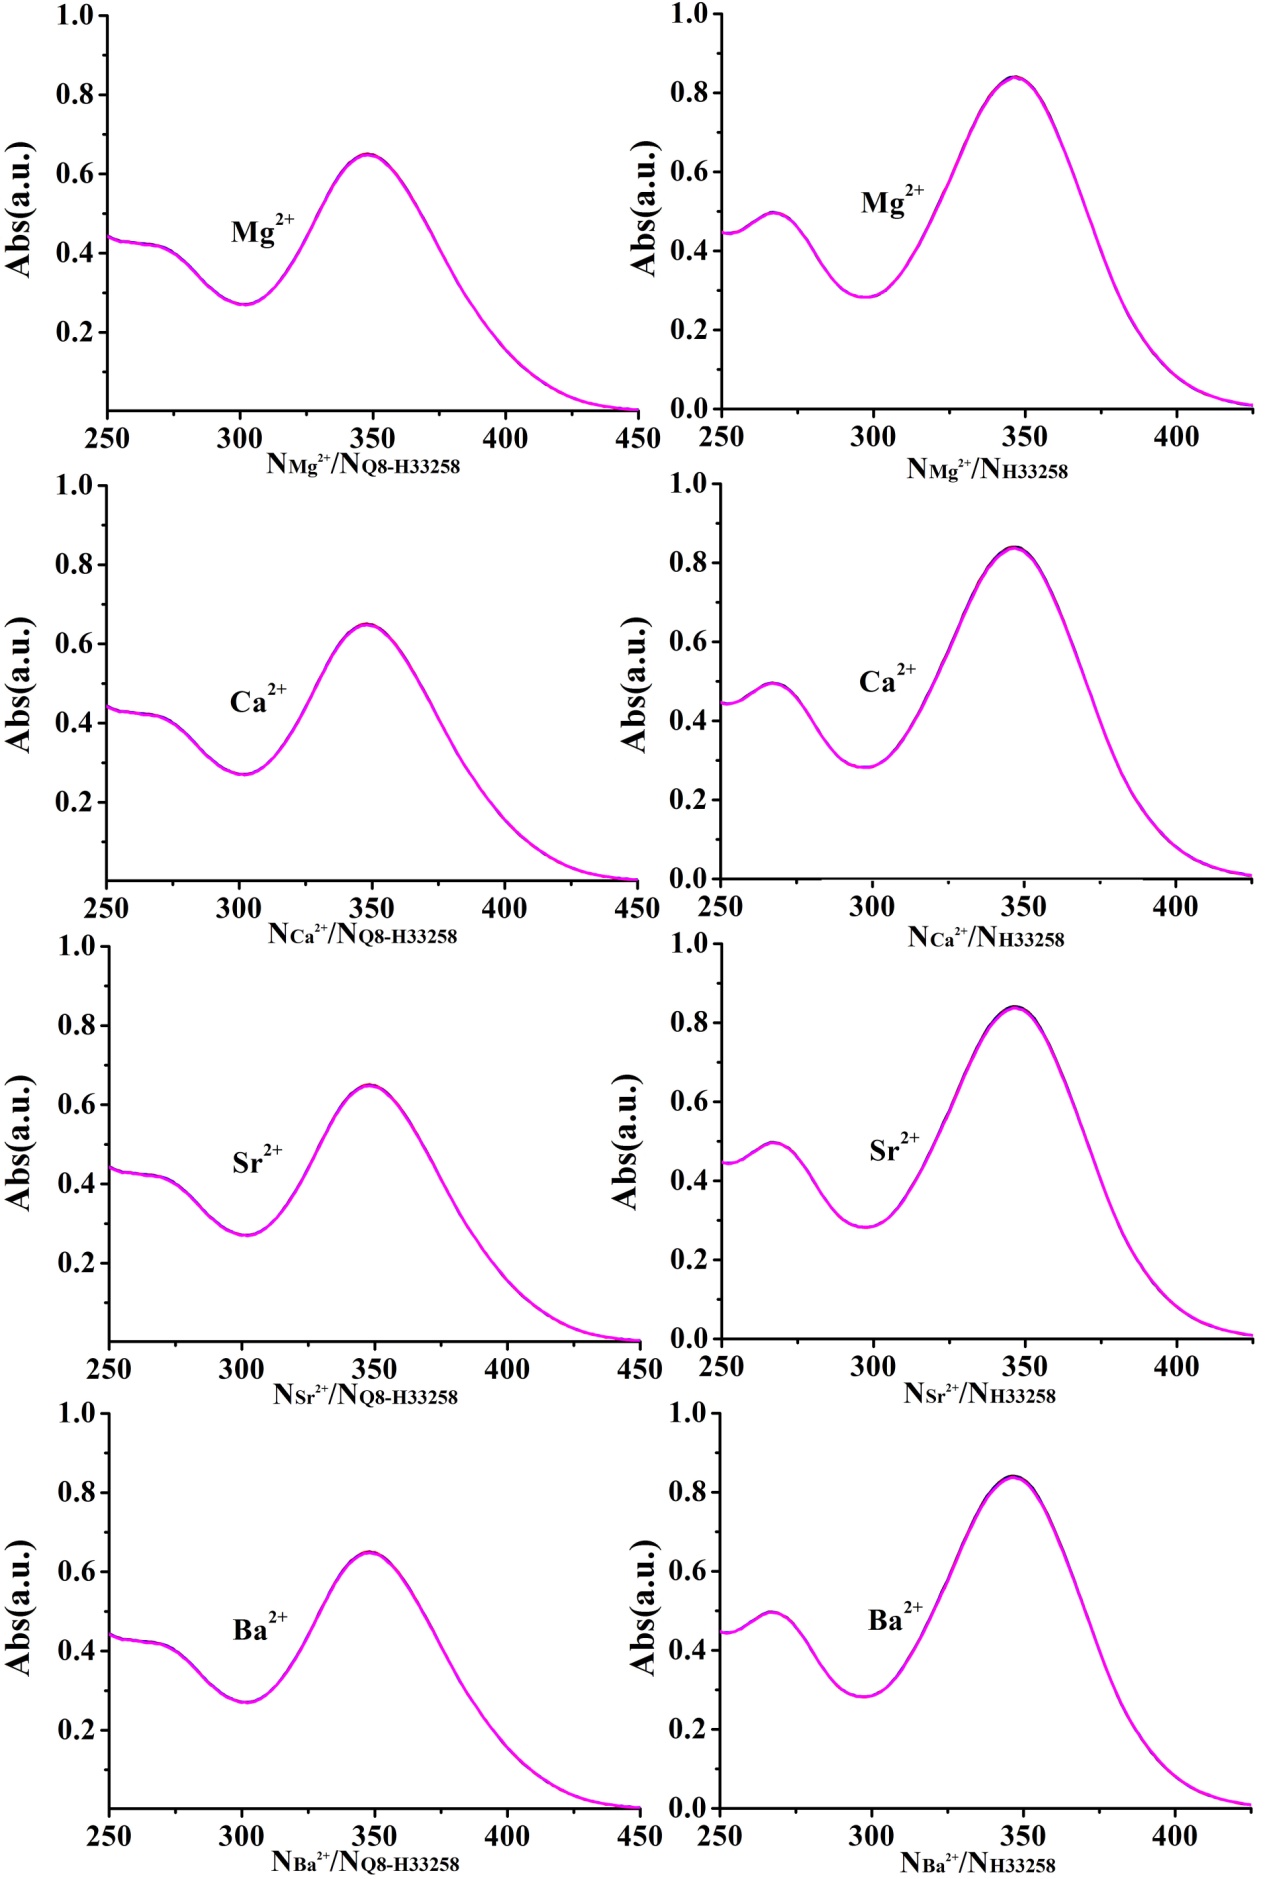


**Figure S13.** Titration absorption spectra of (left) the H33258@Q[8] inclusion complex (2:1; 10 μM) and (right) H33258 (20 μM) with AE2+ cations at pH=4.5.


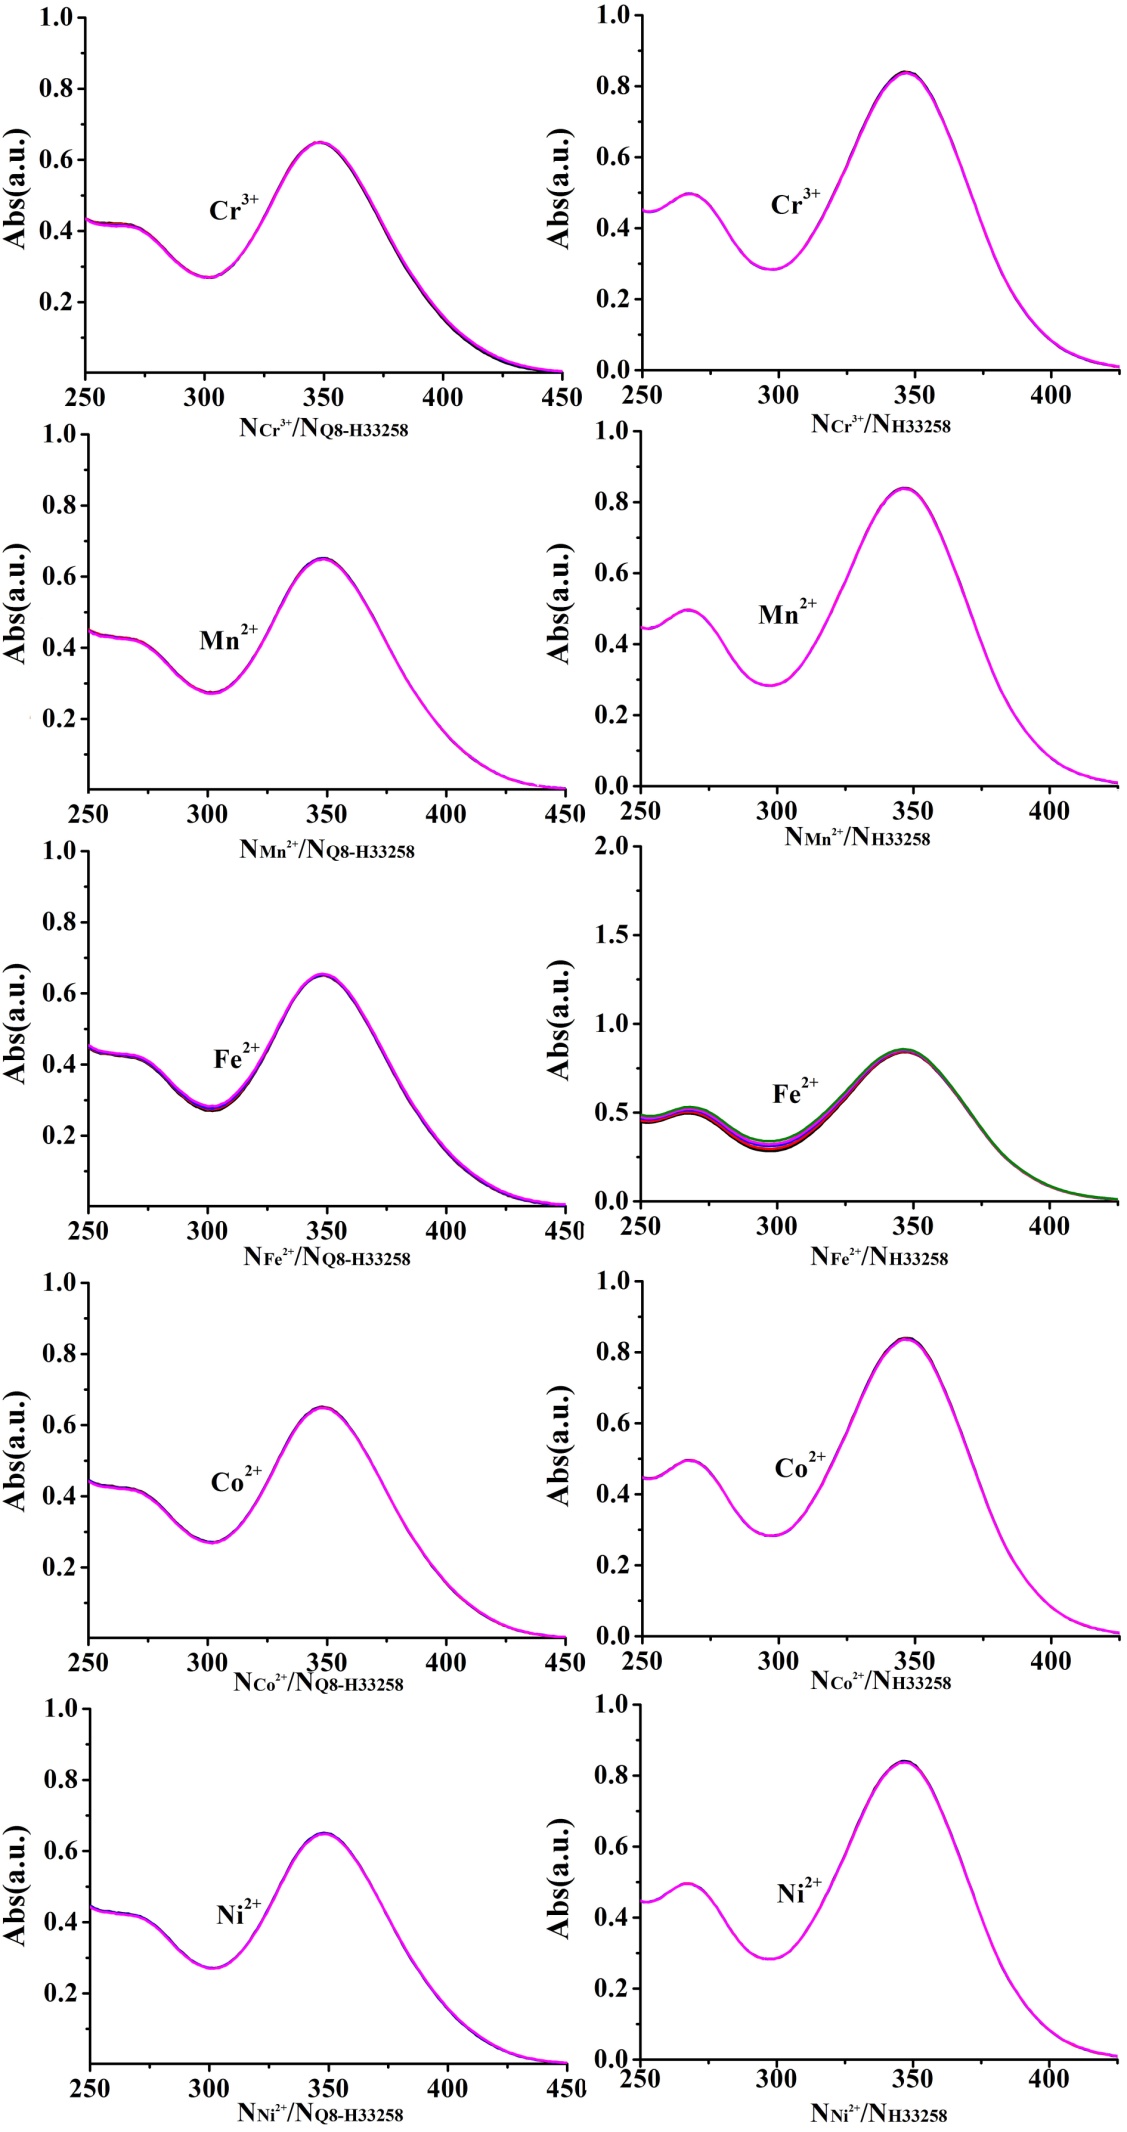

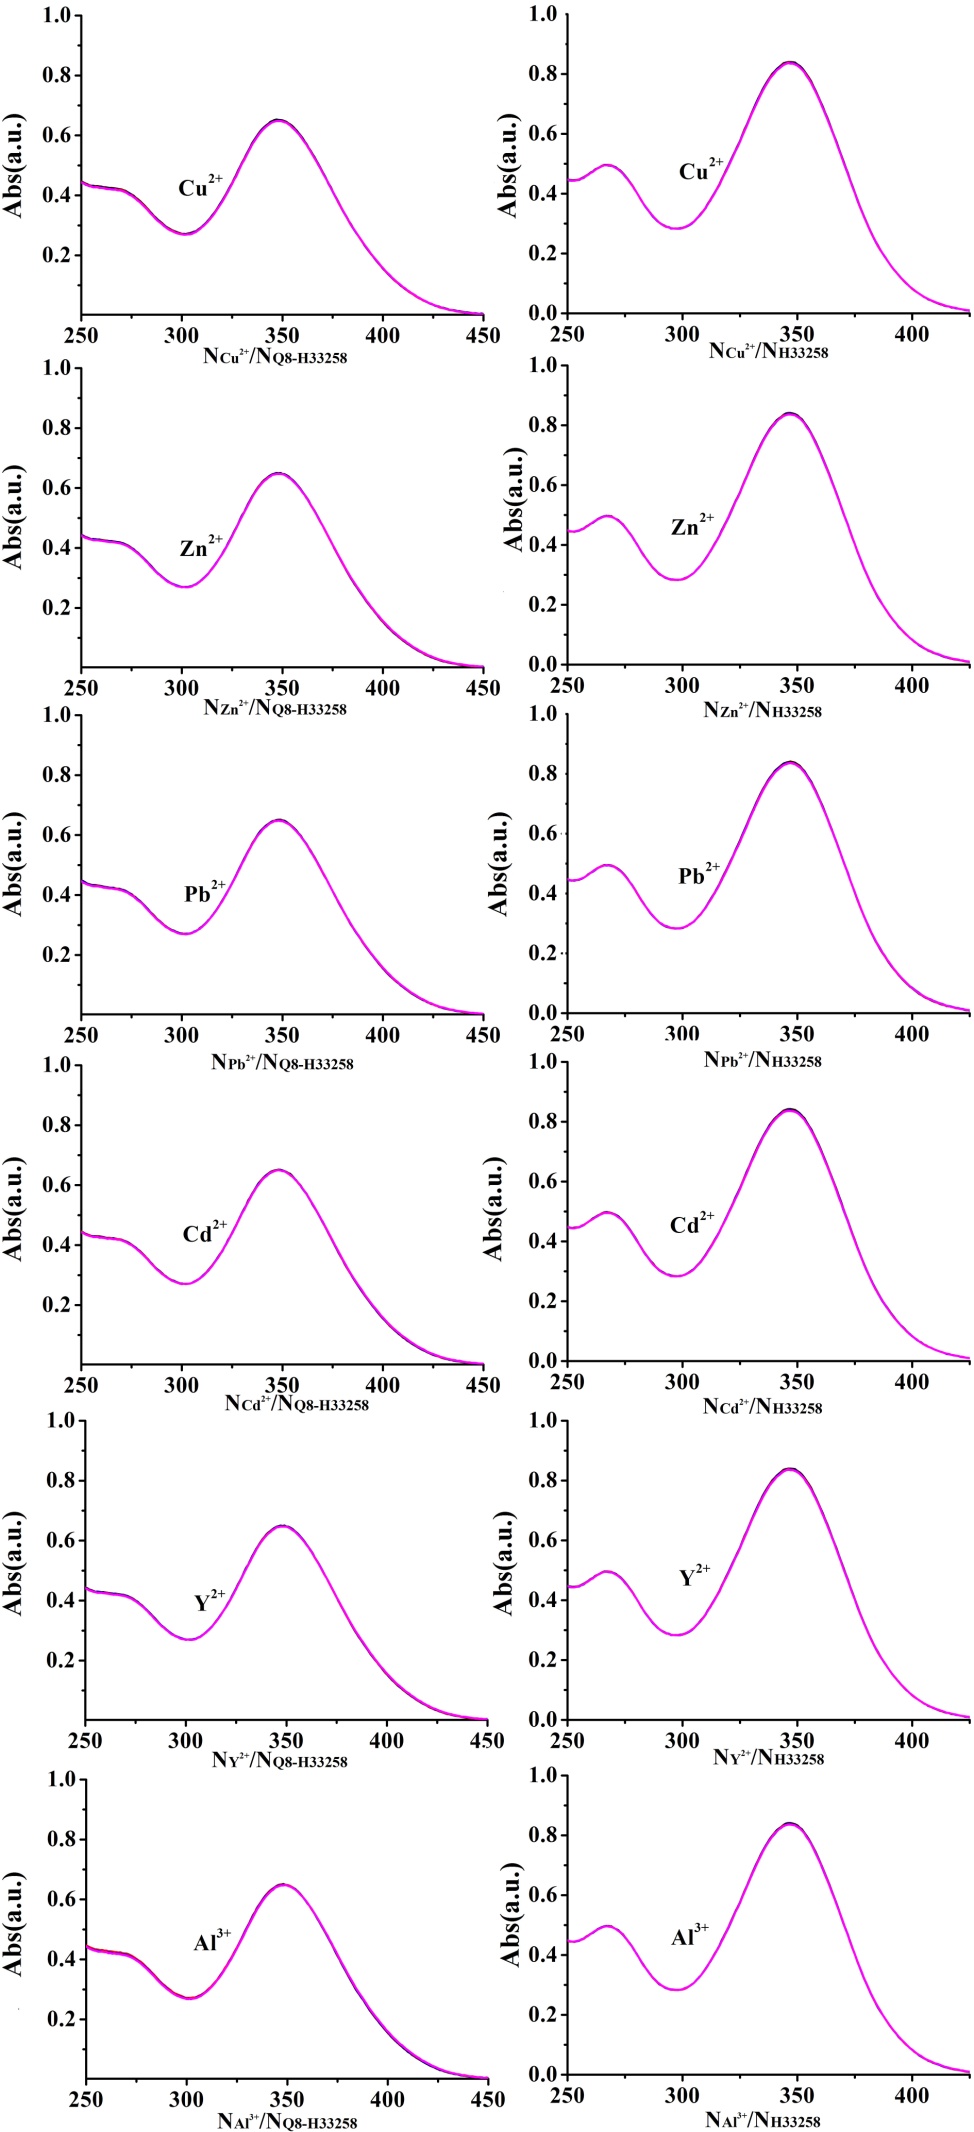

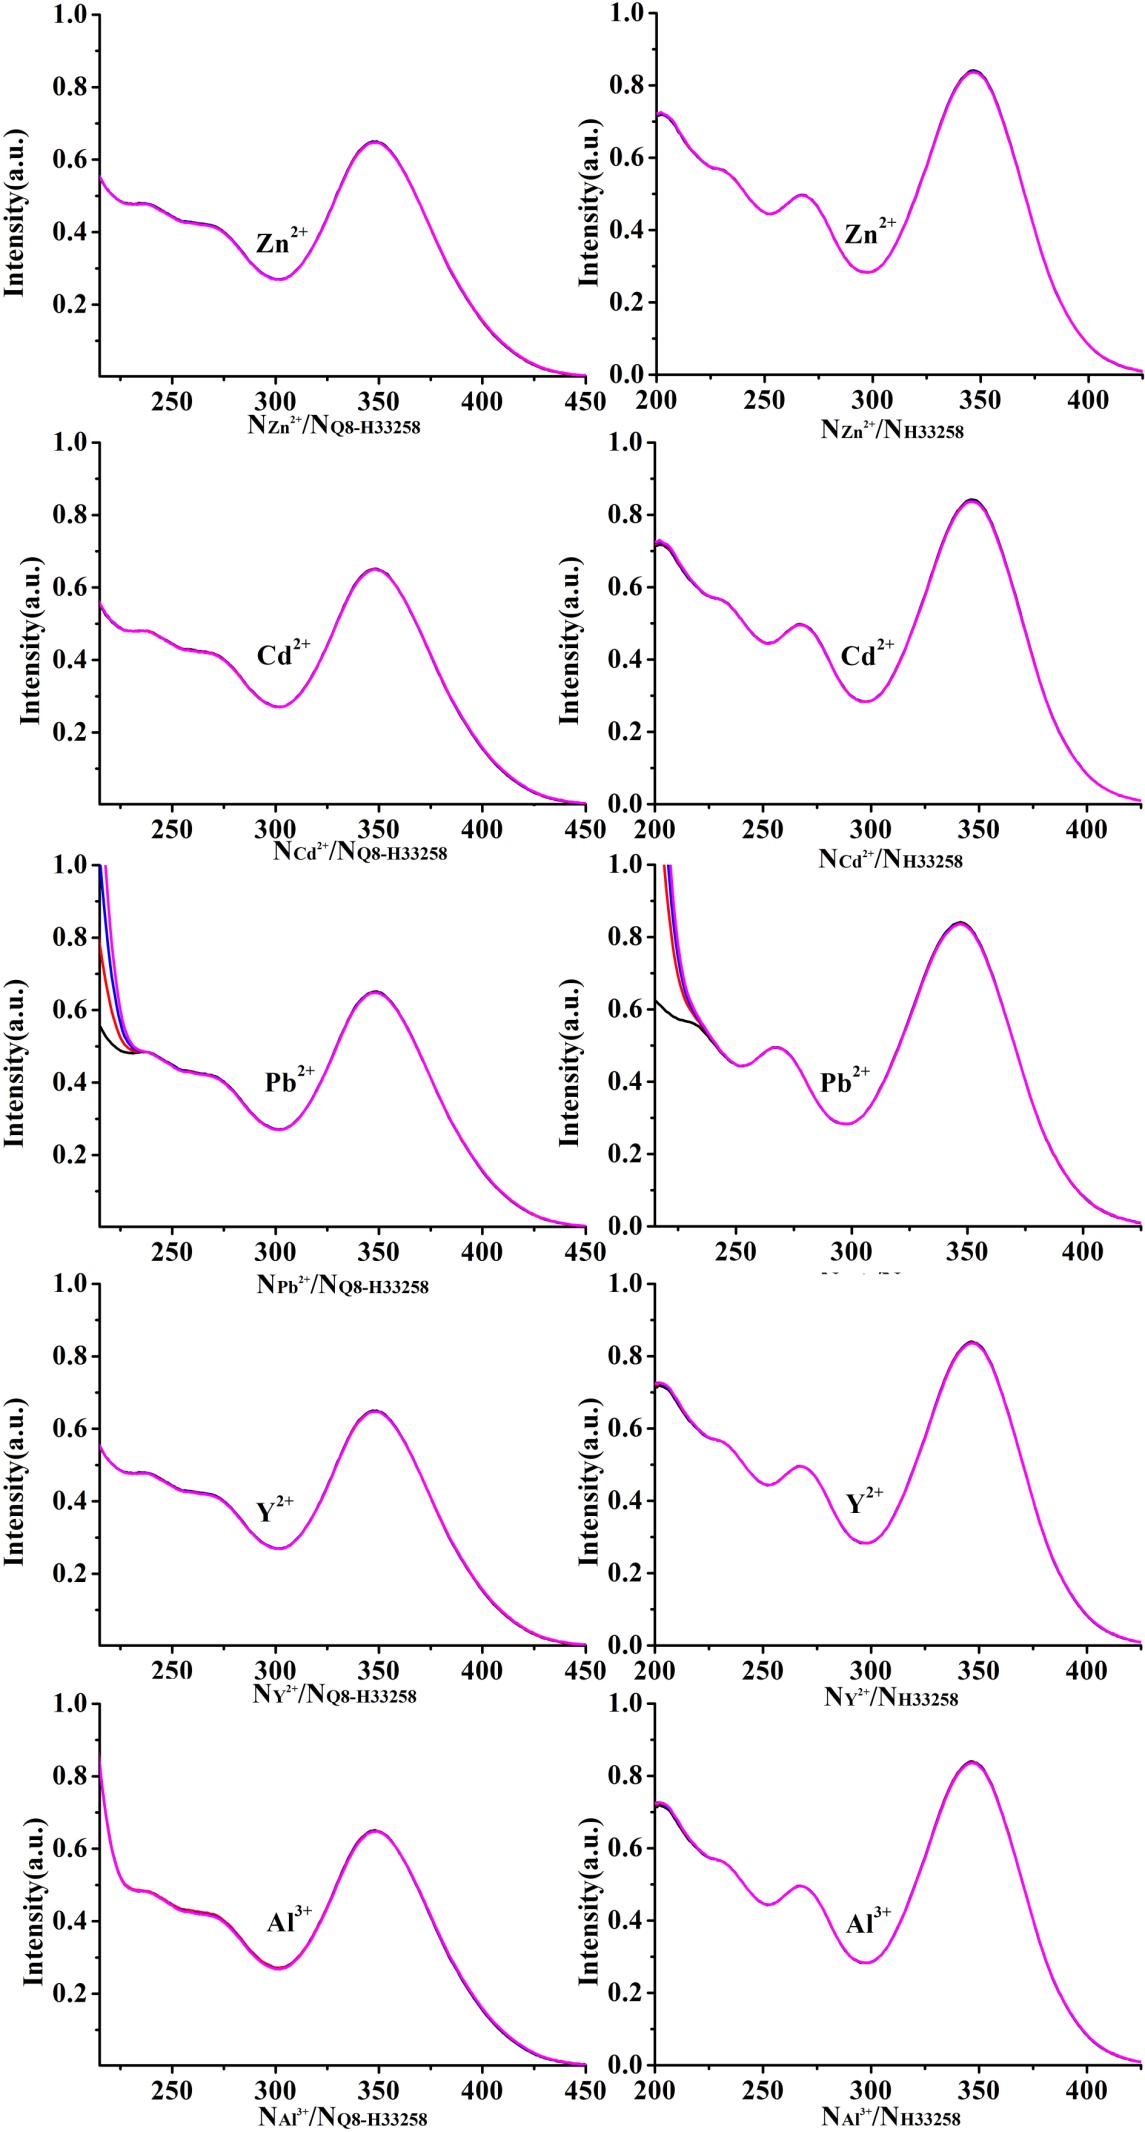


**Figure S14.** Titration absorption spectra of (left) the H33258@Q[8] inclusion complex (2:1; 10 μM) and (right) H33258 (20 μM) with Trn+ cations at pH=4.5.


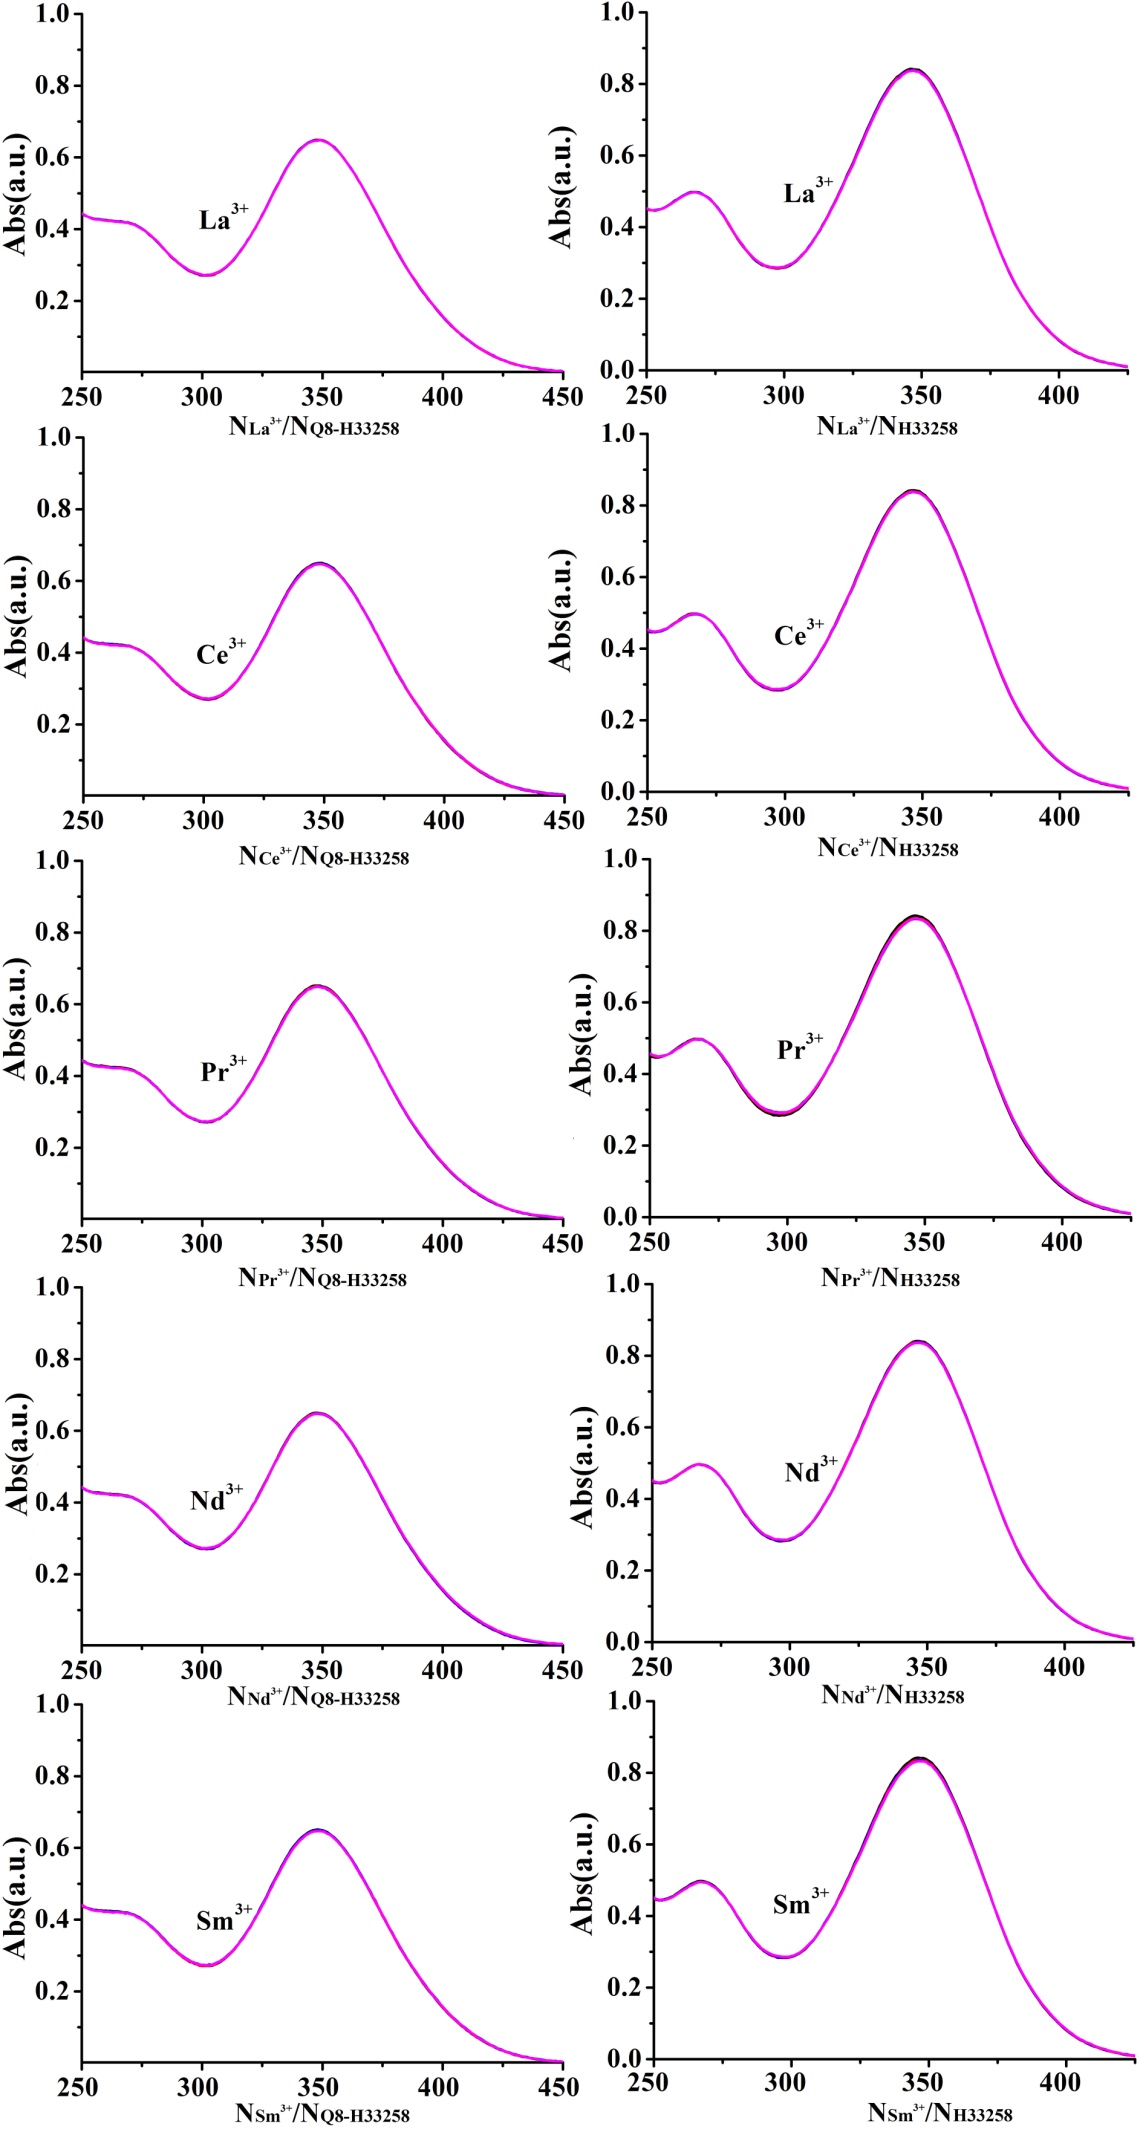

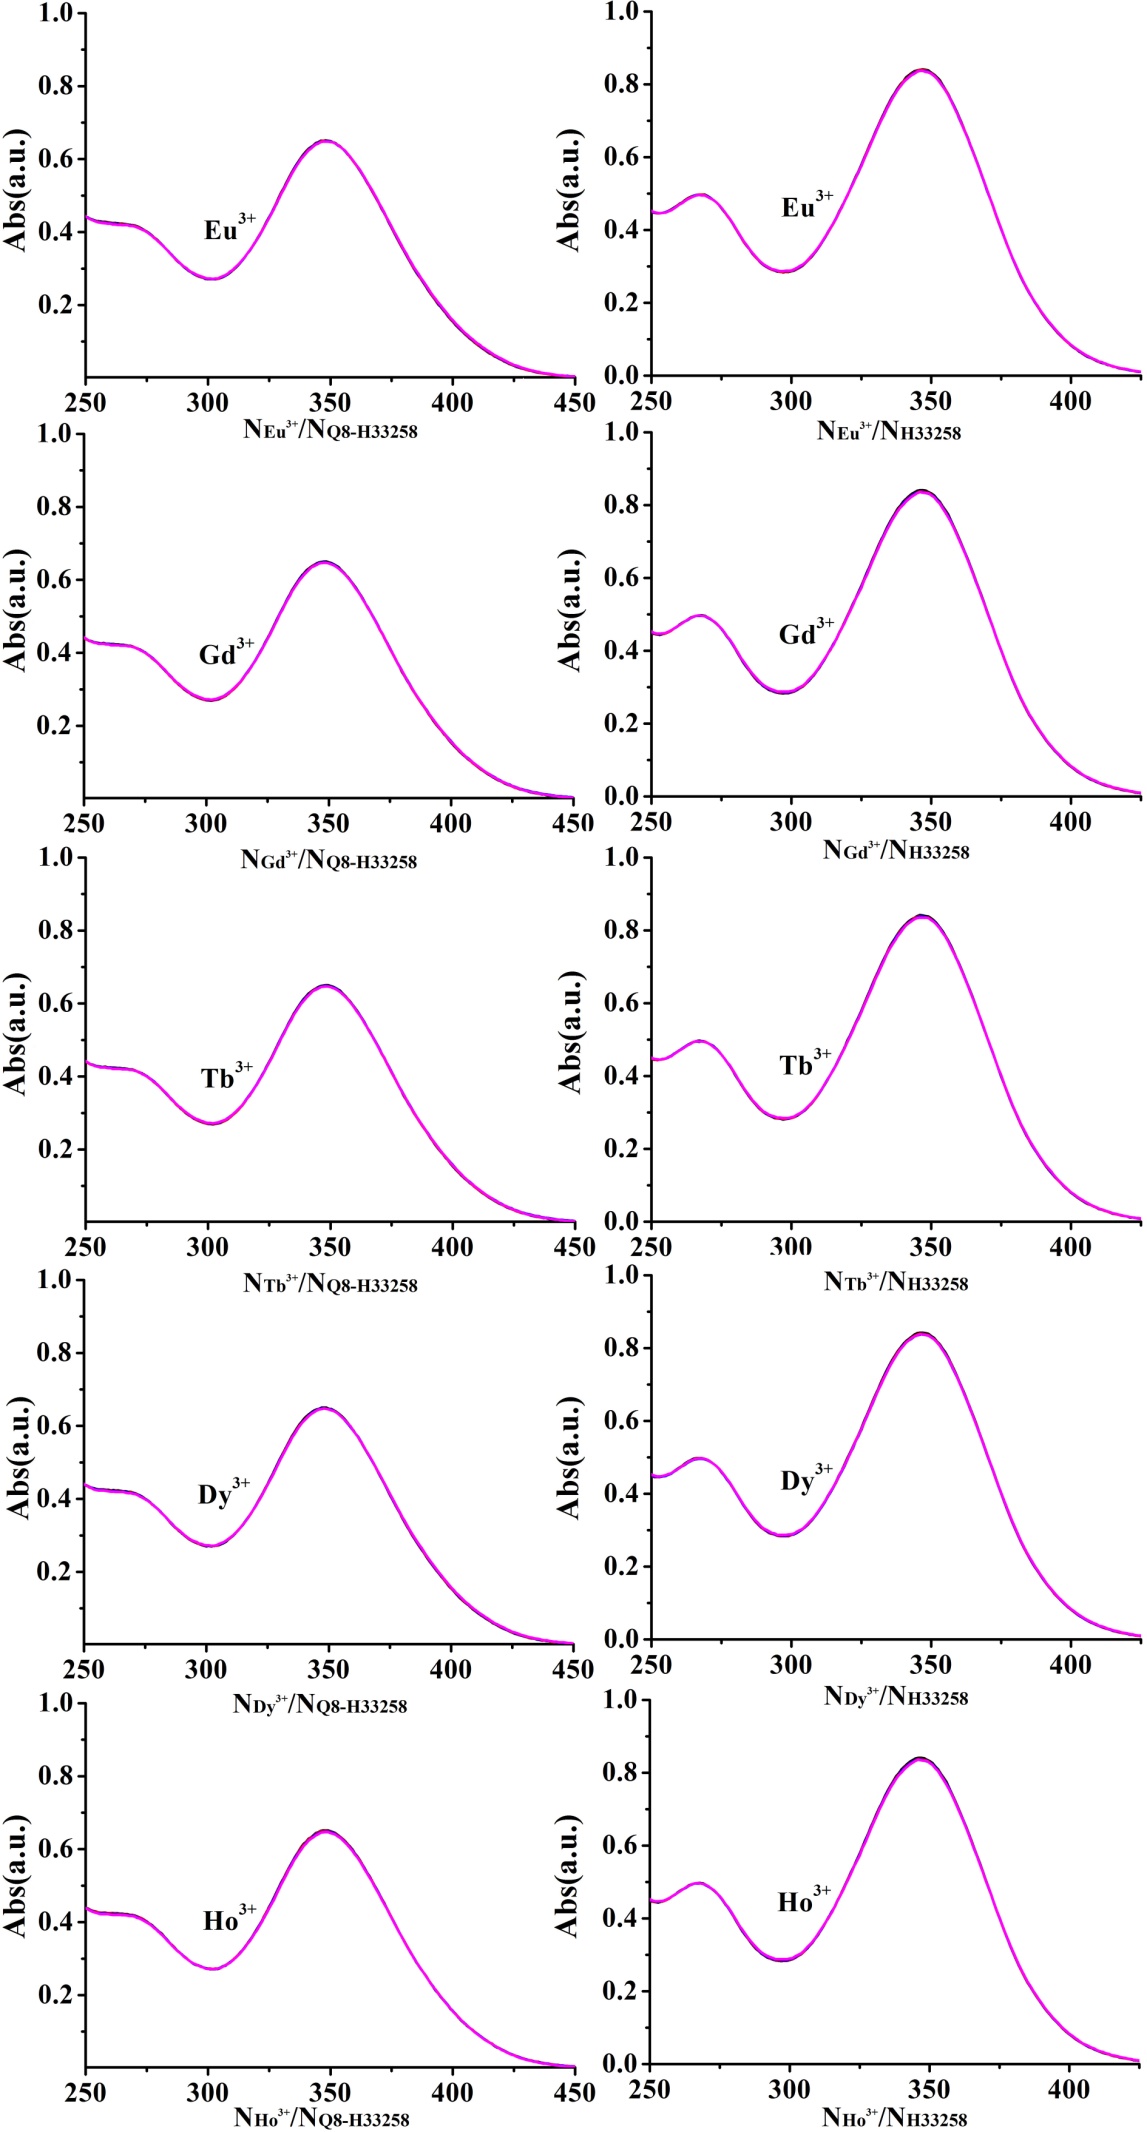

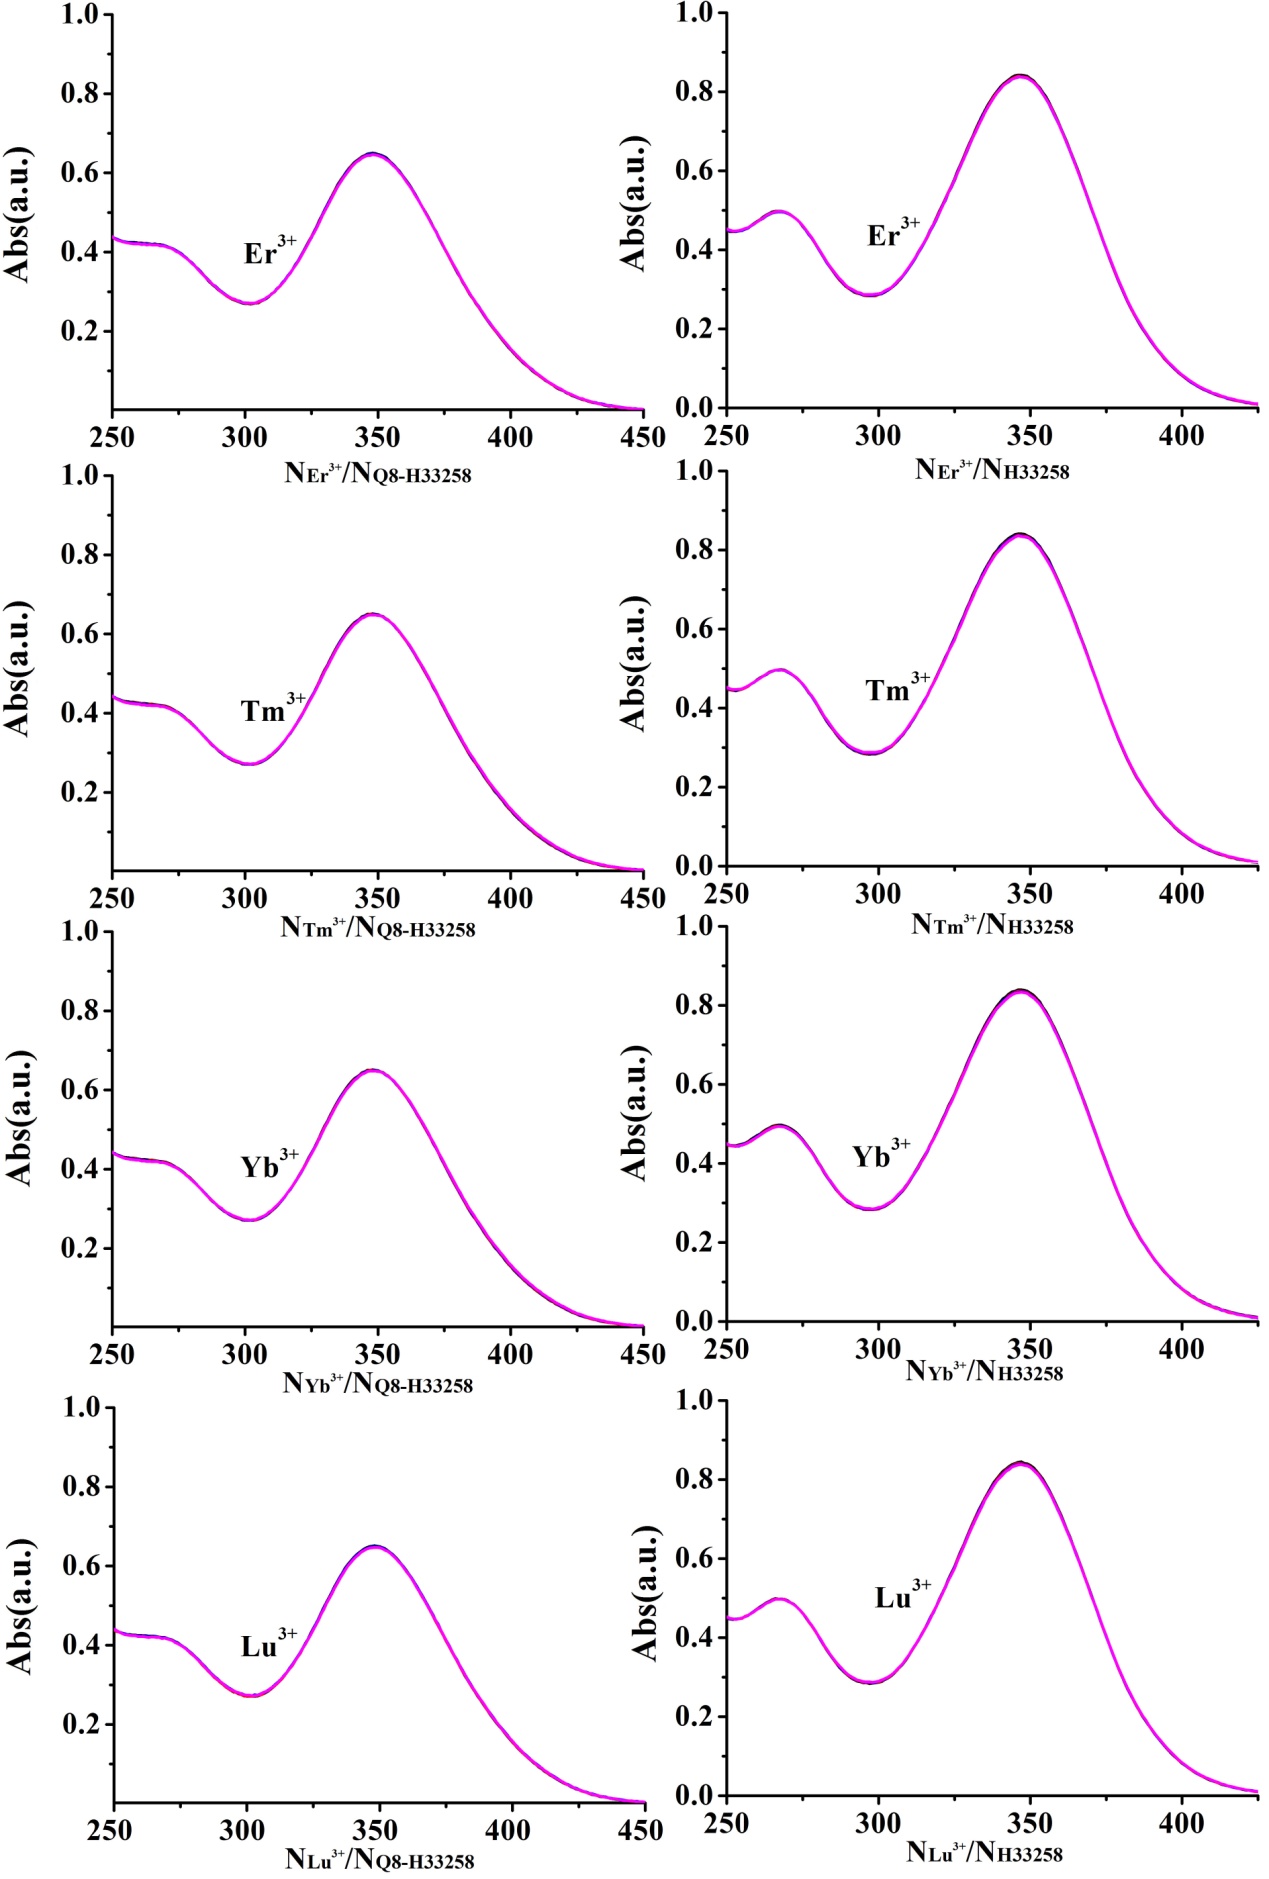


**Figure S15.** Titration absorption spectra of (left) the H33258@Q[8] inclusion complex (2:1; 10 μM) and (right) H33258 (20 μM) with Ln3+ cations at pH=4.5.


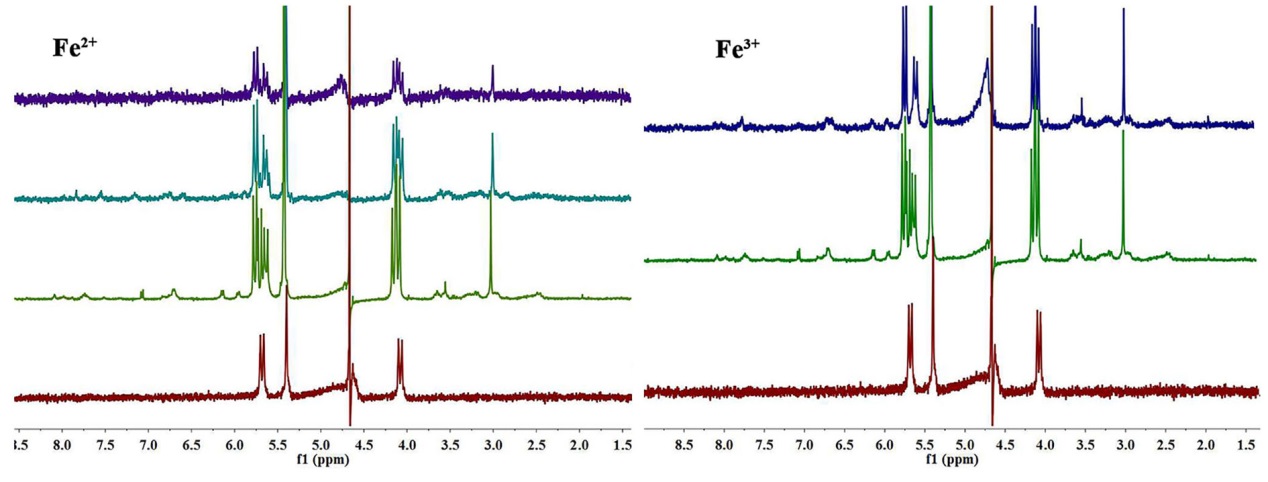


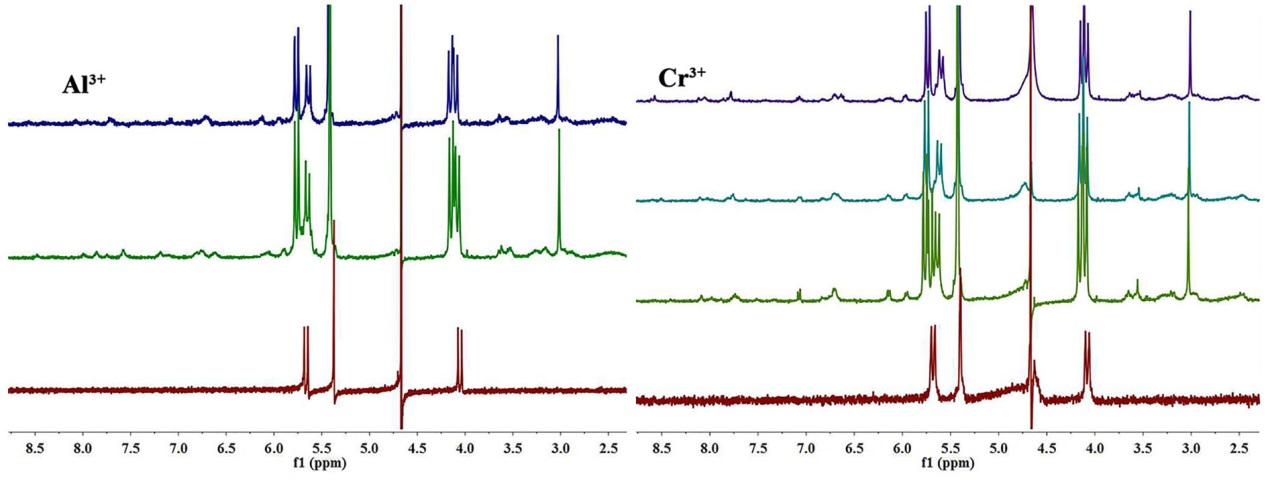


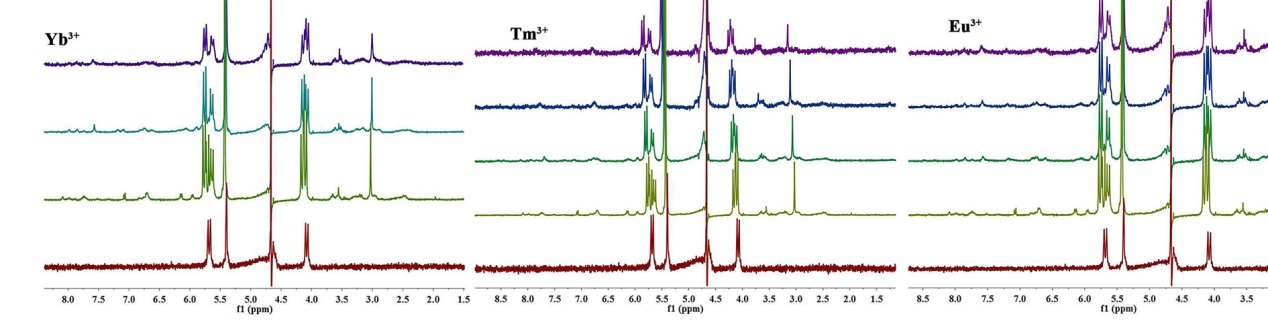


**Figure S16.** Titration 1H NMR spectra (400 MHz, D2O) of the H33258@Q[8] (1:2, 10μM) with increasing amount of the eight Mn+ cations compared to the neat H33258 at pH=7.2.


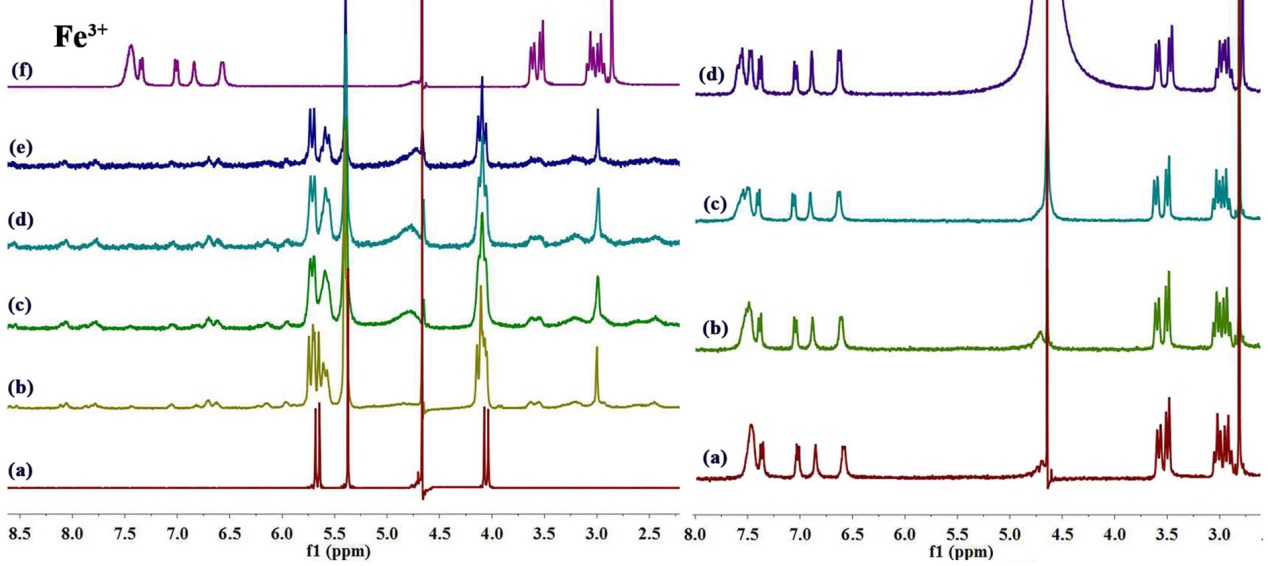


**Figure S17.** (left) Titration 1H NMR spectra (D2O) of (a) neat Q[8],H33258@[8](2:1 10μM) in the presence of (b) 0.00, (c) 5.00, (d) 15, (e) 20, (f) 25 equiv. of Fe3+, (g) neat H33258; (right) a comparison of H33258 in the (a) absence and (b) 5 (c), 15, (d) 35 equiv. of Fe3+ at pH=4.5.
